# Supplementary material
Source: PubMed Central journal article supplement (PMC4390274)
Supplement: supp_M115.048272_mcp.M115.048272-1.pdf [file supp_M115.048272_mcp.M115.048272-1.pdf]

## Supplemental Data

### Unravelling glucan recognition systems by glycome microarrays using the designer approach and mass spectrometry

Angelina S. Palma, Yan Liu, Hongtao Zhang, Yibing Zhang, Barry V. McCleary, Guangli Yu, Qilin Huang, Leticia S. Guidolin, Andres E. Ciocchini, Antonella Torosantucci, Denong Wang, Ana Luísa Carvalho, Carlos M.G.A. Fontes, Barbara Mulloy, Robert A. Childs, Ten Feizi and Wengang Chai

|                         |                                                                                                                                                                                                      |
|-------------------------|------------------------------------------------------------------------------------------------------------------------------------------------------------------------------------------------------|
| <b>Suppl Results</b>    | Linkage analysis of gluco-heptasaccharides with linear sequences and homo-linkages by negative-ion ESI-CID-MS/MS                                                                                     |
|                         | Linkage analysis of a gluco-pentasaccharide isolated from the hydrolysate of barley $\beta$ -glucan by negative-ion ESI-CID-MS/MS.                                                                   |
|                         | Mixture analysis of <i>Poria cocos</i> gluco-oligosaccharide fractions by ESI-CID-MS/MS and of derived NGLs by microarray                                                                            |
|                         | Saturation Transfer Difference (STD)-NMR analyses of CBMs                                                                                                                                            |
| <b>Suppl Discussion</b> | Observations on Dectin-1 interactions with synthetic branched oligosaccharides by other methods using oligosaccharides in solution                                                                   |
| <b>Suppl Methods</b>    |                                                                                                                                                                                                      |
| <b>Fig. S1</b>          | Microarray analyses using microarrays of 12 soluble glucan polysaccharides to reveal their expression of ligands and antigens for the 14 proteins investigated.                                      |
| <b>Fig. S2</b>          | Quasi-MS <sup>3</sup> spectra of gluco-heptasaccharides with homo-linkages                                                                                                                           |
| <b>Fig. S3</b>          | Negative-ion ES-CID-MS/MS product-ion spectrum of Pullu-7 with hetero-linkages                                                                                                                       |
| <b>Fig. S4</b>          | Negative-ion ES-CID-MS/MS product-ion spectra of gluco-trisaccharides with mixed 1,4- and 1,6-linkages                                                                                               |
| <b>Fig. S5</b>          | Negative-ion ES-CID-MS/MS product-ion spectra of 1,3-linked oligosaccharides with 1,6 branching                                                                                                      |
| <b>Fig. S6</b>          | Analyses of the $\alpha$ 1,3-gluco-oligosaccharide rich <i>Poria</i> fractions, before and after removal of contaminating $\alpha$ 1,4-gluco-oligosaccharides                                        |
| <b>Fig. S7</b>          | Carbohydrate microarray analyses of His-tagged murine and human Dectin-1                                                                                                                             |
| <b>Fig. S8</b>          | 'On-array' inhibition of Dectin-1 and <i>CmCBM32-2</i> binding to immobilized NGLs with $\beta$ 1,3-linked oligosaccharides                                                                          |
| <b>Fig. S9</b>          | Comparison of the binding of Dectin-1, 2G8-IgG, 1E12-IgM, <i>TmCBM4-2</i> and <i>CmCBM32-2</i> to natural linear $\beta$ 1,3-linked and synthetic branched $\beta$ 1,3/ $\beta$ 1,6 oligosaccharides |
| <b>Fig. S10</b>         | STD NMR analyses of CBMs with $\beta$ 1,3-linked trisaccharide Lam-3                                                                                                                                 |
| <b>Table S1</b>         | Polysaccharides examined and selected as sources of gluco-oligosaccharides, after their partial depolymerisation                                                                                     |

|                         |                                                                                                                    |
|-------------------------|--------------------------------------------------------------------------------------------------------------------|
| <b>Table S2</b>         | Glucan recognizing proteins investigated and their reported oligosaccharide recognition                            |
| <b>Table S3</b>         | Gluco-oligosaccharides used for development of ESI-CID-MS/MS method.                                               |
| <b>Table S4</b>         | <sup>1</sup> H NMR assignments for Barley-5a (Glcβ1,3Glcβ1,4Glcβ1,6Glcβ1,4Glc) in D <sub>2</sub> O at 30 °C.       |
| <b>Table S5</b>         | <sup>1</sup> H-NMR to corroborate the presence of some α1,4 on poria heptasaccharide/poria polysaccharide          |
| <b>Table 6A</b>         | MALDI-MS analysis of NGLs derived from gluco-oligosaccharide fractions with homo-linkages                          |
| <b>Table S6B</b>        | MALDI-MS analysis of NGLs derived from gluco-oligosaccharide fractions with hetero-linkages                        |
| <b>Table S6C</b>        | MALDI-MS analysis of NGLs prepared from additional commercial and chemically synthesized gluco-oligosaccharides    |
| <b>Table S7A</b>        | Oligosaccharide NGL probes included in the glucan microarrays, sorted by linkage type and degree of polymerization |
| <b>Table S7B</b>        | Fluorescence binding intensities obtained with all the proteins investigated                                       |
| <b>Table S8</b>         | Summary of Dectin-1 interactions with linear β1,3- and branched β1,3/β1,6-linked glucose sequences                 |
| <b>Suppl References</b> |                                                                                                                    |

## Supplemental Results

### Linkage analysis of gluco-heptasaccharides with linear sequences and homo-linkages by negative-ion ESI-CID-MS/MS

For ESI-CID-MS/MS analysis of the linear longer chain gluco-oligosaccharides, heptasaccharides ([supplemental Table S3](#)) were used as representatives. In the spectrum of  $\alpha$ 1,2-linked Cyano-7 (Fig. 2E), the fragments observed were those with neutral losses of 18/78/120 Da arising from  $[M-H]^-$  and the respective C-ions, identifiable for three consecutive residues up to C<sub>5</sub>. These are the same fragmentation as those for the corresponding 1,2-linked disaccharide kojibiose (Fig. 2A), although the <sup>0,4</sup>A-h ions (e.g. m/z 1073, 911 and 749) were very weak. In the spectrum of the  $\beta$ 1,3-linked Lam-7 (Fig. 2F) only a full set C-ions, C<sub>6</sub> to C<sub>1</sub>, were observed, with neutral losses of 162 Da, defining the linear sequence. The absence of A-type ions indicated 1,3-linkages as in nigerose (Fig. 2B). For the  $\alpha$ 1,4-linked Malto-7, the spectrum (Fig. 2G) had features very similar to those of the 1,4-linked disaccharide maltobiose (Fig. 2C). The major ions were those with neutral losses of 60/78/120 Da from the  $[M-H]^-$  and the C-ions. These fragments are identifiable for four consecutive residues. Further product-ion scanning, using C<sub>4</sub> (m/z 665) as the precursor, revealed the fragmentation in the lower mass region ([supplemental Fig. 2A](#)). Similarly, the  $\alpha$ 1,6-linked Dext-7 showed fragmentation features (Fig. 2H) identical to that of the  $\alpha$ 1,6-linked disaccharide isomaltose (Fig. 2D). The Dext-7 showed A-type fragmentation with neutral losses of 60/90/120 Da, apparent only for the first three consecutive residues. Further quasi-MS<sup>3</sup> using fragment ions C<sub>4</sub> (m/z 665) and C<sub>3</sub> (m/z 503) as precursors produced similar A-type fragment ions in the lower mass region, indicating 1,6-linkages ([supplemental Fig. 2B](#)).

### Linkage analysis of a gluco-pentasaccharide isolated from the hydrolysate of barley $\beta$ -glucan by negative-ion ESI-CID-MS/MS.

A pentasaccharide, Barley-5a, was isolated from barley  $\beta$ -glucan hydrolysate obtained by digestion with a novel cellulase with high transglycosylation activity. The sequence was predicted to be Glc $\beta$ 1,3Glc $\beta$ 1,4Glc $\beta$ 1,4Glc $\beta$ 1,4Glc based on the literature knowledge of barley  $\beta$ -glucan and the specificity of the enzyme used for cleavage. The MS/MS spectrum (Fig. 4A) obtained agreed with the reducing and non-reducing terminal 1,4- and 1,3-linkages, respectively. However, a 1,6-linkage with A-type ion set -60/90/120 was identified for an internal linkage (Fig. 4A), which is clearly different from the 1,4-linkage with A-type ion set -60/78/120. Therefore the sequence for this pentasaccharide was assigned as Glc $\beta$ 1,3Glc $\beta$ 1,4Glc $\beta$ 1,6Glc $\beta$ 1,4Glc, different from the predicted three consecutive 4-linkages at the reducing side. The 2D TOCSY NMR spectrum ([supplemental Table S4](#)) of this oligosaccharide is consistent with the above mass spectrometric assignment and the expected  $\beta$ -configuration was corroborated. Six differentiated spin systems were clearly identified and attributable to the glucose residues; one  $\alpha$ - and one  $\beta$ -reducing residue, a non-reducing terminal  $\beta$ -residue, and three internal residues characteristic of 3-linked-Glc $\beta$ , 4-linked-Glc $\beta$ , and 6-linked-Glc $\beta$ . The chemical shifts for H6 of the 6-linked glucose (in bold, [supplemental Table S4](#)) showed particularly clear glycosylation shifts.

### Mixture analysis of *Poria cocos* gluco-oligosaccharide fractions by ESI-CID-MS/MS and of derived NGLs by microarray

*Poria cocos* polysaccharide was selected as a source of  $\alpha$ 1,3-linear gluco-oligosaccharides(1). However, the ESI-CID-MS/MS product-ion spectrum of its heptasaccharide fraction Poria-7, obtained by gel filtration chromatography from the acid hydrolysate (BioGel P4 fraction), indicated the presence of 1,4-linked glucose as a minor (20-30 %) contaminant (Fig. 4B). This was revealed by the weak A-type ion set -60/78/120 (e.g. m/z 1091/1073/1031) unique for 4-linkage (Table 1B),

in addition to the major C-ions at  $m/z$  989, 827, 665, 503, 341, consistent with dominant 1,3-linkage. These observations were in accord with our initial microarray binding data with NGLs of *Poria cocos* BioGel P4 oligosaccharide fractions with  $>DP-2$  using *TmCBM41*, which is known to recognize  $Glc\alpha 1,4Glc$ -linked sequences (supplemental Fig. S6A).  $^1H$ - and  $^{13}C$ -NMR corroborated the presence of  $\alpha 1,3$ -linked in addition to  $\alpha 1,4$ -linked sequences (supplemental Table S5). Although the  $^1H$ -NMR spectrum at 700 MHz was crowded (not shown), the relative peak heights of resolved resonances, such as those from H5 of the 3-linked Glc and H3 of the 4-linked glucose, indicated that the fraction contained at least 20% of  $\alpha 1,4$ -linked component. Therefore, the *Poria* fractions DP3 to DP13 were purified by preparative HPTLC to remove the  $\alpha 1,4$ -linked contaminants (HPTLC fractions). HPTLC analysis of *Poria*-7, for example, showed that the contaminant was largely removed (supplemental Fig. 6B), and MALDI-MS analyses confirmed the heptasaccharide as the major component (supplemental Fig. 6C). The purified *Poria*-7 was analysed by ESI-MS/MS and the fragment ions from the 4-linked contaminant ( $m/z$  1091/1073/1031) were largely removed (Fig. 4B). A series of NGL probes of *Poria*-DP3 to DP13 was generated (supplemental Table 6A) and microarray analysis corroborated purity as the binding signals by the 1,4-linkage-specific *TmCBM41* were largely disappeared, whereas strong binding signals were detected with the  $\alpha 1,3$ -linkage-specific MOPC104E (supplemental Fig. 6A).

### Saturation Transfer Difference (STD)-NMR analyses of CBMs

STD NMR has been used to investigate the geometry and kinetics of protein-glycan complex formation(2). This technique involves NMR spectroscopy of a mixture of a protein with a ligand in solution. NMR spectra of the mixture are obtained with and without radiofrequency irradiation of the protein, and subtraction of one spectrum from the other. The difference spectrum contains only signals from parts of the ligand interacting with the protein, to which saturation has been transferred. It is therefore possible to use this method to determine binding epitopes on glycan ligands(3).

To complement the observations from microarray analyses the interaction of four  $\beta 1,3$ -glucan-binding CBMs with  $\beta 1,3$ -linked trisaccharide Lam-3 was analyzed in solution by STD-NMR. These were *TmCBM4-2*, *BhCBM6*, *CmCBM32* and *CmCBM6-2*. The STD signals were detected with each of the four CBMs (supplemental Fig. 10A), indicating their ability to interact with Lam-3 under the solution phase NMR conditions. By comparing the STDs as percentages of the corresponding unperturbed signals, we were able to distinguish, at the atomic level, the modes of recognition by these CBMs in solution.

With *TmCBM4-2* (supplemental Fig. 10B), STDs were detected arising from all three glucose residues. The interactions with the H2 protons both of the reducing and the internal residue were particularly strong. These observations are in line with crystal structure evidence(4), in which the binding site is a groove that is long enough to accommodate a hexasaccharide. This can explain the lack of binding signals with Lam-2 and Lam-3 given by this CBM in the microarray analysis (Fig. 5B). Whereas, in solution, the trisaccharide tested here, Lam-3, may be completely included in the interior of the groove, neither the Lam-2 and Lam-3, gain adequate access to the binding groove when immobilised at their reducing end on the array surface.

With *CmCBM32-2*, *BhCBM6* and *CmCBM6-2* (supplemental Fig. 10C-E), STDs were observed mainly from the non-reducing end residue of Lam-3, which implies that the non-reducing terminal makes the closest contacts with the three proteins, although with different contact protons. Literature data for *CmCBM32-2* are limited, but the data on *BhCBM-6* are in agreement with crystal structure, in which the binding site is described as a small, blocked-off groove(5). With *CmCBM6-2*, STDs were observed strongly at the non-reducing residue and weakly at the internal and reducing residues. This CBM has a broad specificity and two glycan binding sites, one of which (cleft A) interacts with the NR residue, and the second of which (cleft B) accommodates at least a trimer(6); the STDs cannot distinguish between the two sites but the results might be



## Supplemental Methods

**Proteins investigated.** The proteins investigated and their reported oligosaccharide recognition with references are given in [supplemental Table S2](#).

**Lectins** - Recombinant murine Dectin-1 extracellular carbohydrate recognition domain (CRD) fused to the Fc portion of human IgG at the *N*-terminus(9) was provided by Gordon Brown (University of Aberdeen, UK). Recombinant human Dectin-1 CRD with an *N*-terminal His<sub>10</sub>-tag was purchased from R&D Systems (Minneapolis, MN); recombinant murine Dectin-1 CRD with an *N*-terminal His<sub>6</sub>-tag was a gift from Sino Biologicals (Beijing, China); recombinant human DC-SIGN CRD with the human Fc fused at *C*-terminus(10) was provided by Yvette van Kooyk (VU University Medical Center, Amsterdam) and by Alessandra Cambi (Radboud University Medical Center, The Netherlands); Concanavalin A (ConA) (biotinylated) was purchased from Vector Laboratories.

**Monoclonal antibodies** - Mouse myeloma antibody MOPC 104E-IgM was purchased from Sigma; the monoclonal anti-dextran antibodies m.3.4.1G6-IgG3 and m16.4.12E-IgA were from the Kabat collection of carbohydrate antigens and antibodies (currently housed at SRI International) and were prepared as biotinylated antibodies as described(11); vaccine induced anti- $\beta$ -glucan antibodies 2G8-IgG and 1E12-IgM were prepared as described(12); 1H8-IgG was similarly produced (unpublished).

**CBMs** - The CBMs were produced as recombinant proteins in *Escherichia coli*. Family 6 CBM from *Bacillus halodurans* (*Bh*CBM6), family 4 and family 41 CBMs from the marine hyperthermophile *Thermotoga maritima* (*Tm*CBM4-2 and *Tm*CBM41, respectively), were provided by Alisdair Boraston (University of Victoria, Canada); family 6 and family 32 CBM from the aerobic soil bacterium *Cellvibrio mixtus* (*Cm*CBM6-2 and *Cm*CBM32-2, respectively) were provided by Harry Gilbert (University of Newcastle, UK). Family 11 CBM from *Clostridium thermocellum* (*Ct*CBM11) was prepared as described previously. The recombinant *Bh*CBM6, *Tm*CBM4-2, *Tm*CBM41 and *Cm*CBM6-2 contain *N*- terminal His<sub>6</sub>-tags, and *Cm*CBM32-2 and *Ct*CBM11 a *C*-terminal His<sub>6</sub>-tag (references are in [supplemental Table S2](#)).

**Oligogluco-fructosides and glucan polysaccharides.** *Cyanobacterium* gluco-oligosaccharide fructosides(13) were provided by Eckhard Loos (Regensburg, Germany). The polysaccharides used in this study are listed in [supplemental Table S1](#). A glucan polysaccharide containing  $\alpha$ 1,3-linked sequence was isolated from *Poria cocos* mycelia(1); Dextran polysaccharide was from *Leuconostoc mesenteroides* (Sigma, Dorset, England); the cyclic  $\beta$ -glucan (C $\beta$ G) was isolated from *Brucella* spp. as described(14); and pustulan was from *Umbilicaria papulosa* (Calbiochem, Nottingham, UK). Two glucan polysaccharides containing branched  $\beta$ 1,3- and  $\beta$ 1,6-linkages, grifolan and lentinan, were isolated from the barmy mycelium of *Grifola frondosa*(15) and from *Lentinus edodes*(16), respectively, as described.

**Other gluco-oligosaccharides** The disaccharides kojibiose ( $\alpha$ 1,2), isomaltobiose ( $\alpha$ 1,6), cellobiose ( $\beta$ 1,4) and gentiobiose ( $\beta$ 1,6) were purchased from Sigma, sophorose ( $\beta$ 1,2) from Dextra Laboratories (Reading, England) and nigerose ( $\alpha$ 1,3) from Wako Chemicals (Neuss, Germany). The  $\alpha$ 1,4-linked malto-di- to heptasaccharides (Malto-2 to -7) were from Sigma. The  $\beta$ 1,3-linked laminaribiose, triose and tetraose (Lam-2 to 4) were from Dextra Laboratories, laminaripentaose and -hexaose (Lam-5 and -6) were from Megazyme, and the laminariheptaose (Lam-7) was from Seikagaku (AMS Biotechnology, Abingdon, England). Gluco-oligosaccharides with mixed linkages were from the following sources: panose (Pano-3) and the gluco-tetraose with the sequence of Glc $\alpha$ 1,6Glc $\alpha$ 1,4Glc $\alpha$ 1,4Glc (Pullu-4) were from Sigma; isopanose (i-Pano-3) was provided by Takashi Tonzuka (Tokyo University of Agriculture and Technology). The following oligosaccharides were from Megazyme: barley glucotrioses (A) and (B), glucotetraoses (A), (B)

and (C) (Barley-3a and -b, Barley-4a, -b and -c, respectively), Barley penta- and hexasaccharides (Barley-5a and Barley-6a) and pullulan glucotetraose with the sequence of  $\text{Glc}\alpha 1,6\text{Glc}\alpha 1,4\text{Glc}\alpha 1,4\text{Glc}$  and heptaose with the sequence of  $\text{Glc}\alpha 1,6\text{Glc}\alpha 1,4\text{Glc}\alpha 1,4\text{Glc}\alpha 1,6\text{Glc}\alpha 1,4\text{Glc}\alpha 1,4\text{Glc}$  (Pullu-4 and -7, respectively). Linear  $\beta 1,3$ -linked glucan octa-, nona, and decasaccharides HE-8, HE-9 and HE-10, and branched glucan nona-, deca- and undecasaccharides, HE-9<sup>B7</sup> -10<sup>B2</sup>, -10<sup>B3</sup>, -10<sup>B5</sup>, -10<sup>B7</sup> and -11<sup>B2,6</sup> were synthesized chemically, as described(17). The chemically synthesized hexasaccharide(18), JG-6<sup>B1</sup>, was a generous gift from Jianxin Gu (Fudan University, Shanghai).

**Fig. S1.** Microarray analyses using microarrays of 12 soluble glucan polysaccharides to reveal their expression of ligands and antigens for the proteins investigated.

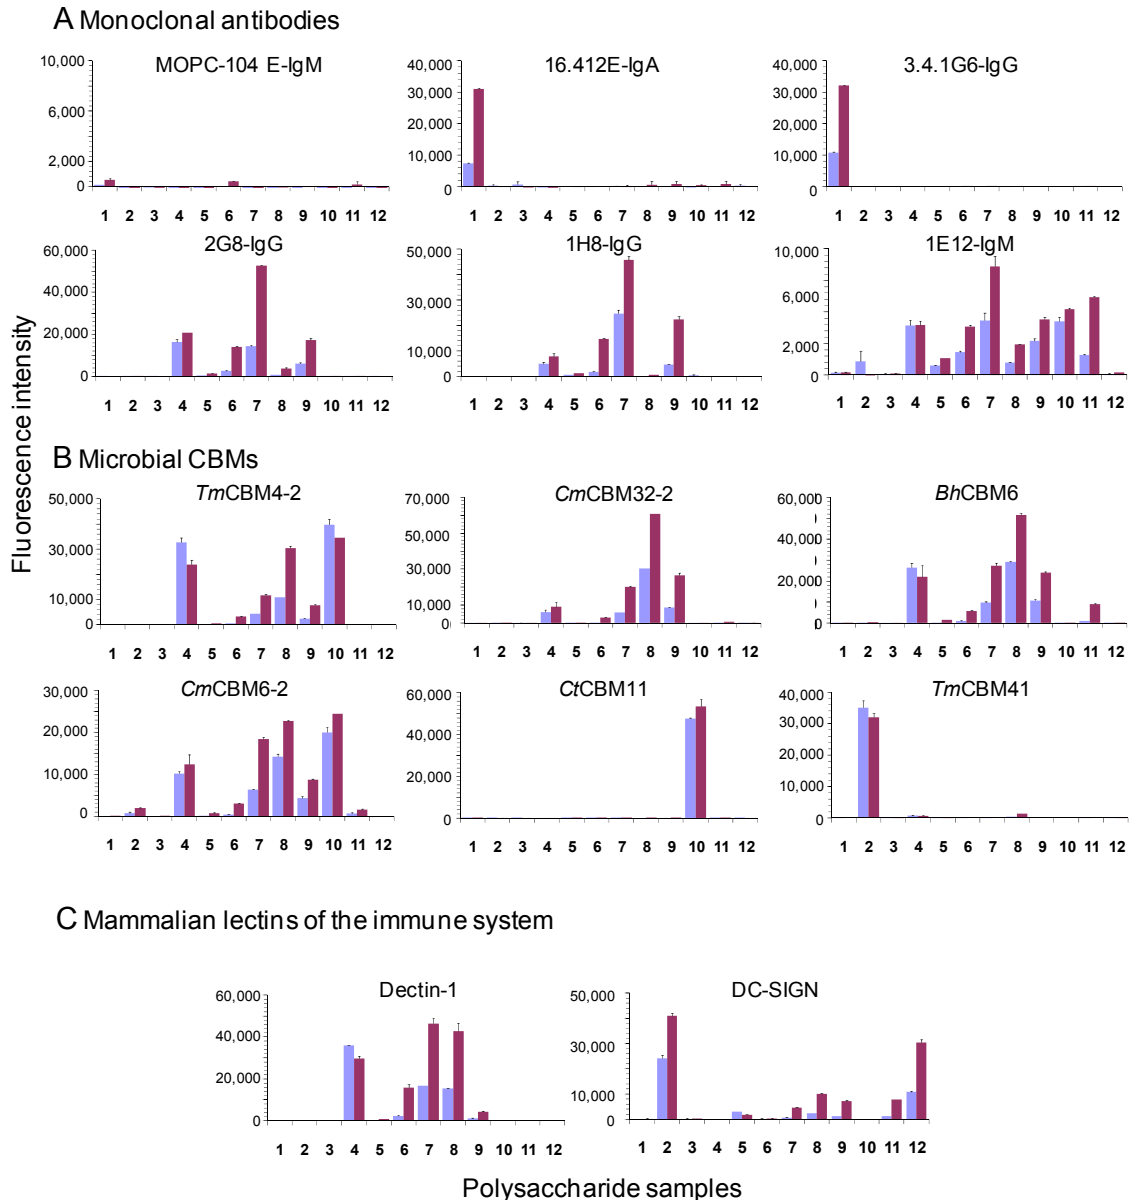

The water-soluble polysaccharide samples (ID 1-12) are listed in [supplemental Table S1](#). (A) murine monoclonal antibodies to  $\alpha$ - or  $\beta$ -glucans; (B) microbial CBMs; (C) receptors of the innate immune system: murine Dectin-1 (His-tagged) and DC-SIGN (human Fc chimera). The binding scores are depicted as fluorescence intensities elicited with 30 and 150 pg polysaccharide per spot (blue and purple bar, respectively). The polysaccharides cyclic- $\beta$ -glucan (ID 3) and laminarin (ID 5) are probably not efficiently retained on the nitrocellulose surface to elicit binding after a binding event due to their low molecular weights. The  $\alpha$ 1,3-glucose-containing *Poria cocos* polysaccharide (ID 13) is not water-soluble, therefore not included in the microarrays. This explains the lack of binding signals with the  $\alpha$ 1,3-glucan-specific MOPC-104E-IgM.



**Fig. S2.** Quasi-MS<sup>3</sup> spectra of gluco-heptasaccharides with homo-linkages Malto-7 ( $\alpha$ 1,4-linked) and Dext-7 ( $\alpha$ 1,6-linked).

**A Malto-7**

MS<sup>3</sup>(quasi): fragment m/z 665

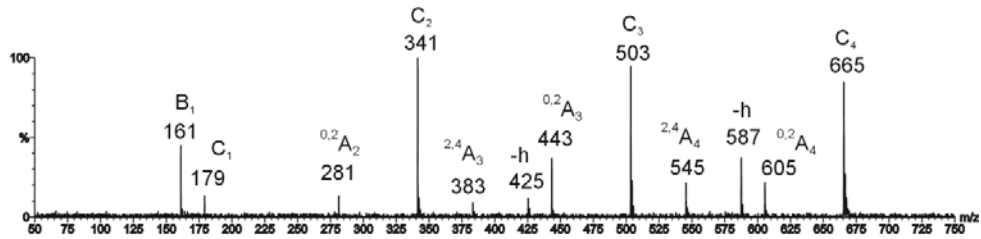

**B Dext-7**

MS<sup>3</sup>(quasi): fragment m/z 665

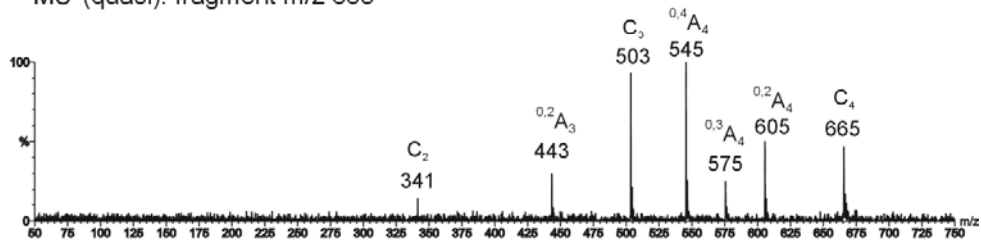

MS<sup>3</sup>(quasi): fragment m/z 503

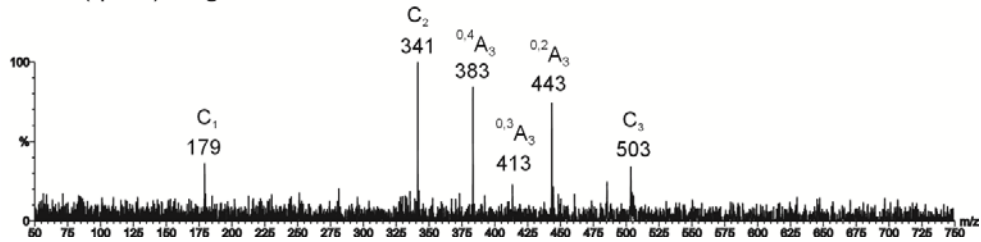

The fragment ions produced by cone voltage fragmentation were used as the precursors: (A) m/z 665 of Malto-7, (B) m/z 665 and m/z 503 of Dext-7.

**Fig. S3.** Negative-ion ES-CID-MS/MS product-ion spectrum of Pullu-7 with hetero-linkages.

Pullu-7 ( $\alpha$ 1-6,4,4,6,4,4)

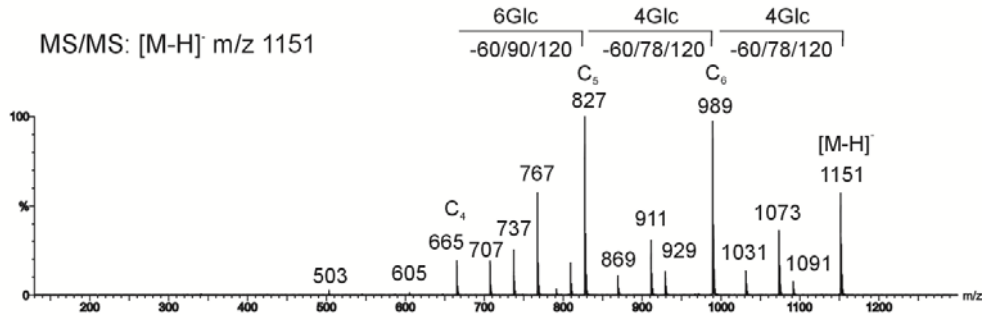

MS<sup>3</sup> (quasi): fragment m/z 665

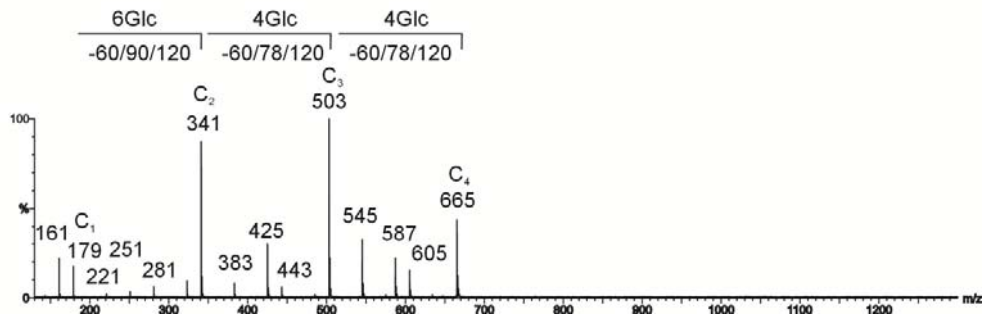

**Fig. S4.** Negative-ion ES-CID-MS/MS product-ion spectra of gluco-trisaccharides with mixed 1,4- and 1,6-linkages

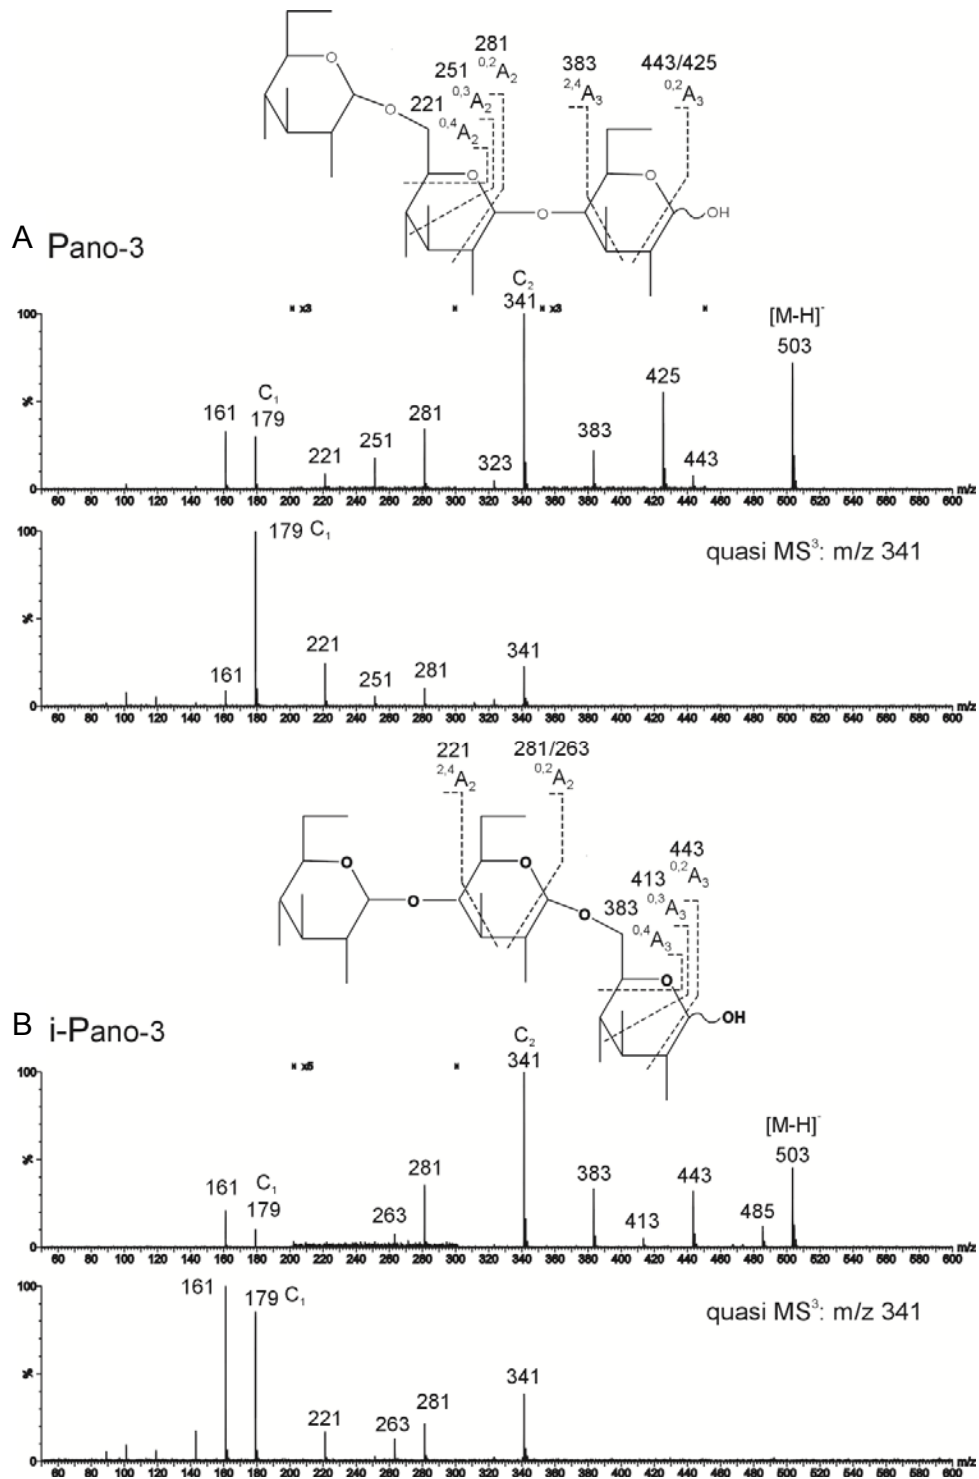

**Fig. S5.** Negative-ion ES-CID-MS/MS product-ion spectra of 1,3-linked oligosaccharides with 1,6 branching.

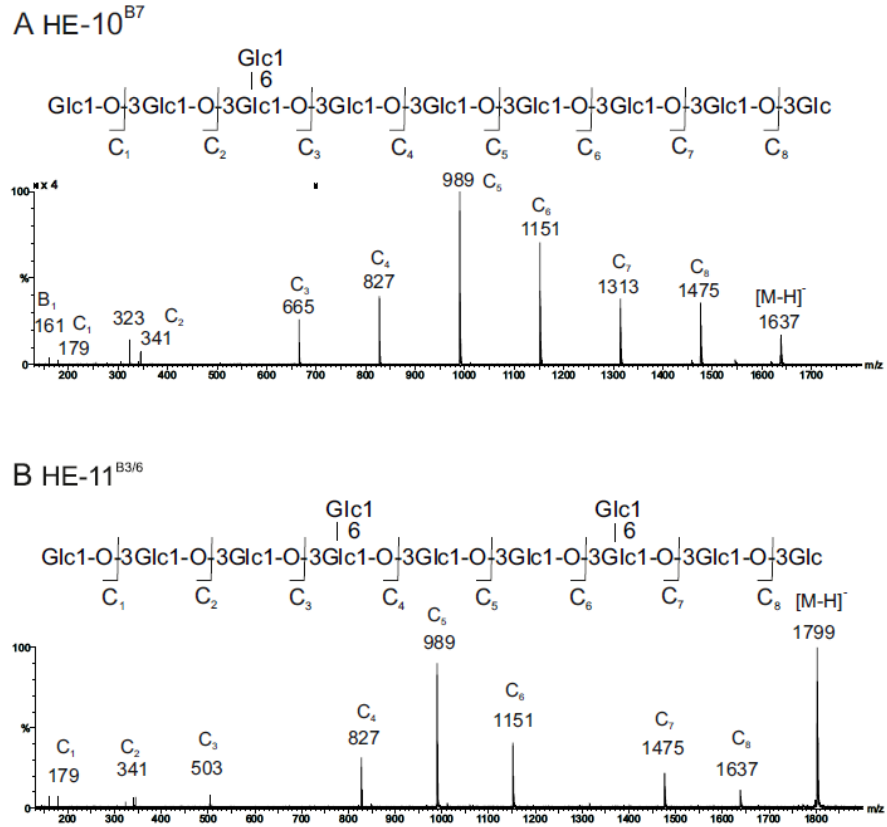

(A) Single branched gluco-decasaccharide HE-10<sup>B7</sup>; (B) Double branched gluco-undecasaccharide HE-11<sup>B3,6</sup>

**Fig. S6.** Analyses of the  $\alpha$ 1,3-gluco-oligosaccharide rich *Poria* fractions, before and after removal of contaminating  $\alpha$ 1,4-gluco-oligosaccharides.

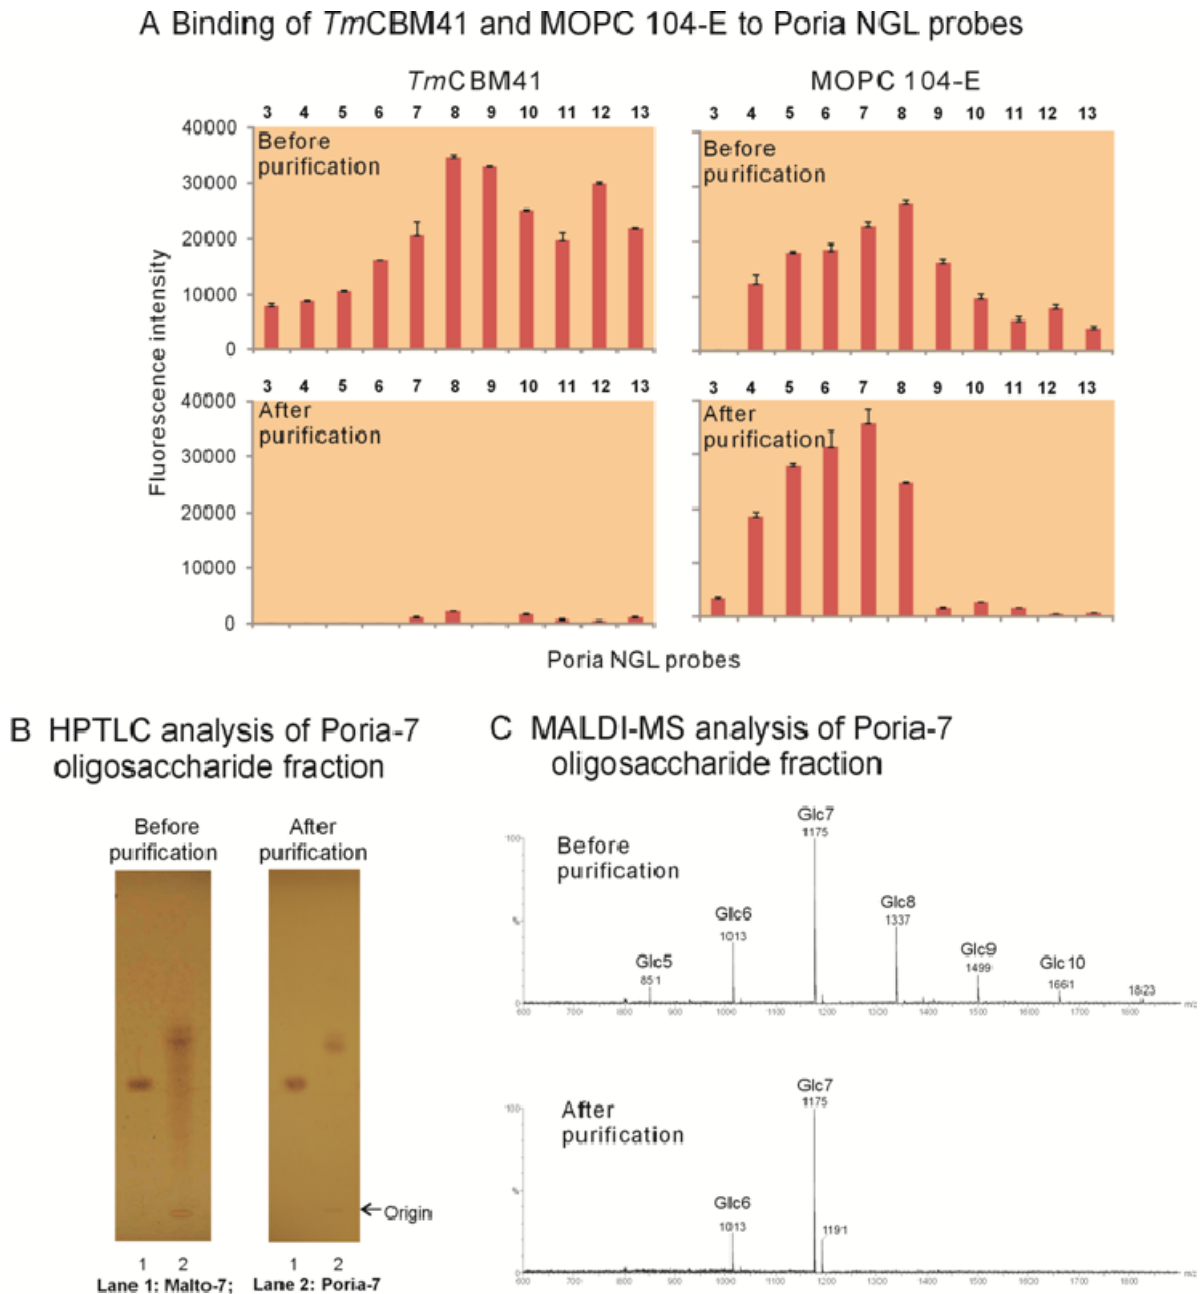

(A) Microarray analyses using NGLs derived from *Poria* oligosaccharide fractions 3-13 (Bio-Gel P4 and HPTLC fractions), tested for binding by an  $\alpha$ 1,4-glucose specific CBM, *Tm*CBM41, and a  $\alpha$ 1,3-glucose specific antibody, MOPC 104-E; (B) Analytical HPTLC analysis of the *Poria*-7 oligosaccharide fraction before and after removal of the  $\alpha$ 1,3-glucose contaminant; Malto-7 was included as a reference; (C) MALDI-MS of the Bio-Gel P4 and HPTLC fractions of *Poria*-7.

**Fig. S7.** Carbohydrate microarray analyses of His-tagged murine and human Dectin-1.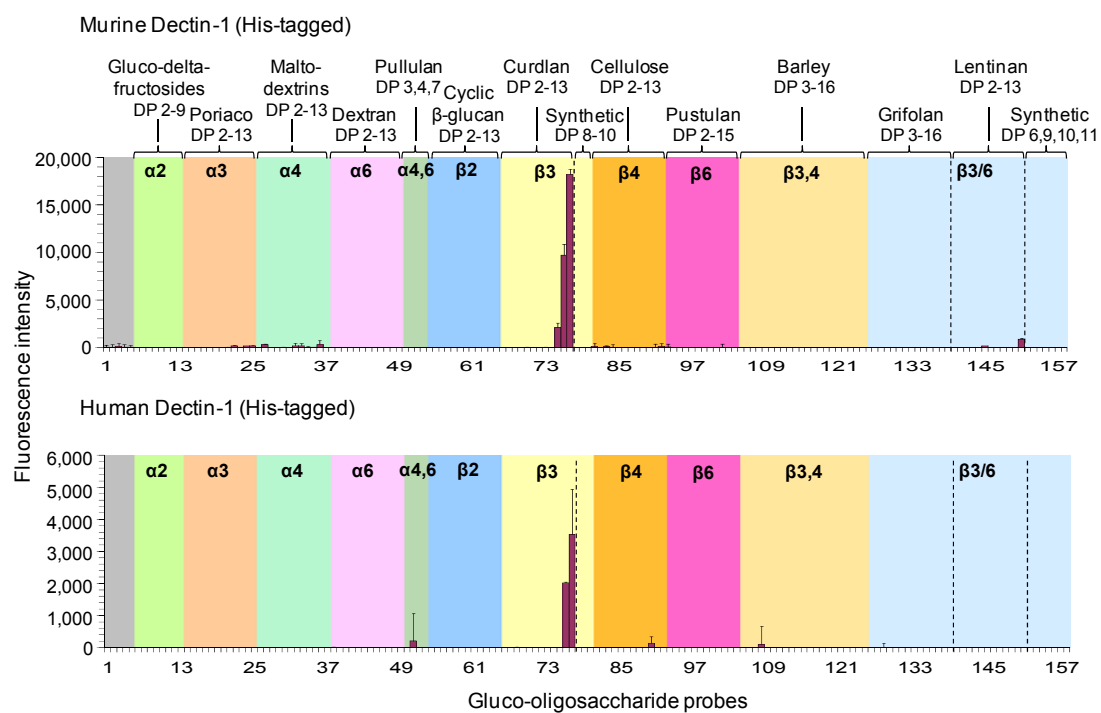

Both recombinant proteins showed highly restricted binding to the higher oligomers of linear  $\beta$ 1,3-linked glucose generated from curdlan polysaccharide. Please see legend to **Fig. 5** for details.

**Fig. S8.** 'On-array' inhibition of Dectin-1 and *CmCBM32-2* binding to immobilized NGLs with  $\beta$ 1,3-linked oligosaccharides

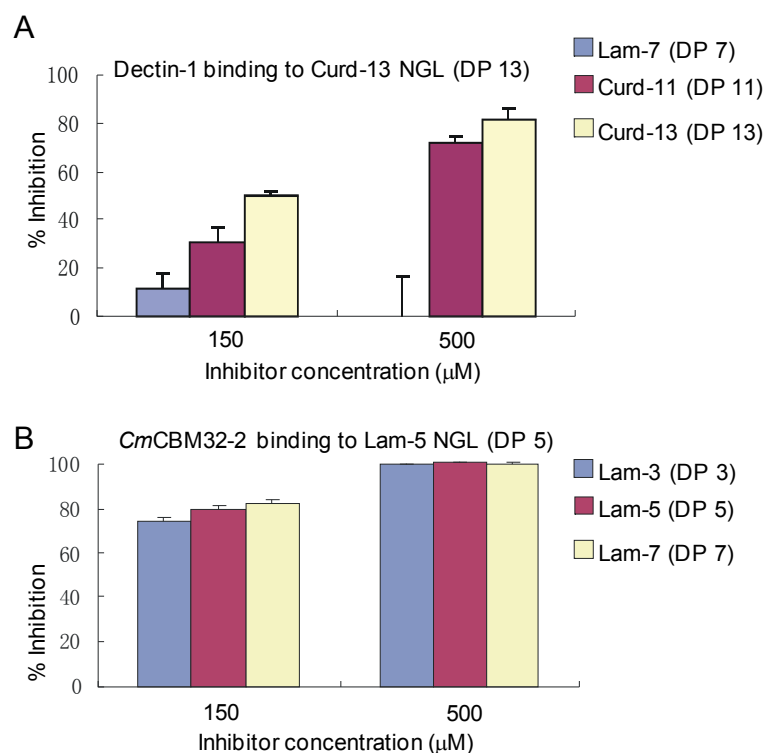

(A) Inhibition of the binding of murine Dectin-1 Fc chimera to immobilized  $\beta$ 1,3-linked Curd-13 NGL by  $\beta$ 1,3-linked oligosaccharides Curd-11 and Curd-13 but not Lam-7; Curd-13 NGL was arrayed at 5 fmol/spot. The 'on-array' inhibition results thus corroborate the chain length requirement for Dectin-1 recognition observed in the microarray analysis as there was a higher inhibitory activity of the curdlian oligosaccharide fraction with DP-13 over that with DP-11; and a lack of inhibition by the oligosaccharide with DP-7. (B) Inhibition of the binding of *CmCBM32-2* to immobilized  $\beta$ 1,3-linked Lam-5 NGL by  $\beta$ 1,3-linked oligosaccharides Lam-3, Lam-5 and Lam-7; Lam-5 was arrayed at 5 fmol/spot. In contrast with Dectin-1, for *CmCBM32-2* the short  $\beta$ 1,3 oligosaccharides showed high inhibitory activities of binding, thus corroborating the results of the microarray analysis.

The murine Dectin-1-Fc and *CmCBM32-2* were used at non-saturating concentrations of 5 $\mu$ g/ml. The final concentrations of the oligosaccharides used as inhibitors of binding are indicated on the Y axis. The results are expressed as percentage of inhibition of binding as follows: percentage inhibition = [(spot fluorescence intensity no inhibitor - spot fluorescence intensity with inhibitor)/(spot fluorescence intensity no inhibitor - spot fluorescence intensity negative control)]  $\times$  100.

**Fig. S9.** Comparison of the binding of Dectin-1, 2G8-IgG, 1E12-IgM, *TmCBM4-2* and *CmCBM32-2* to natural linear  $\beta$ 1,3-linked and synthetic branched  $\beta$ 1,3/ $\beta$ 1,6 oligosaccharides.

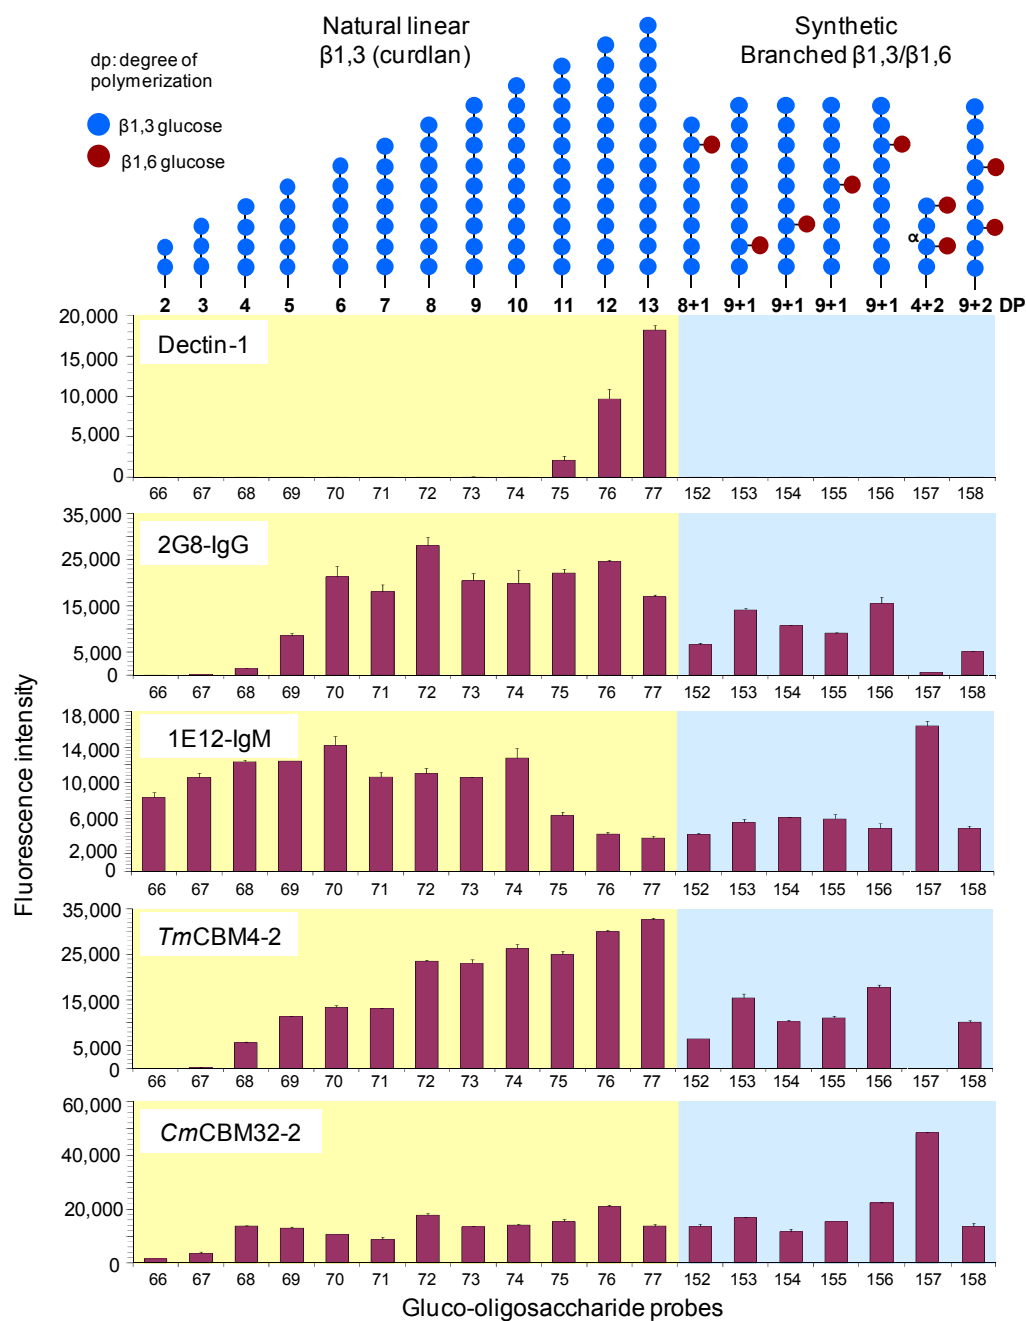

The results highlight different chain length-dependencies and the abilities of 2G8-IgG and 1E12-IgM antibodies, *TmCBM4-2* and *CmCBM32-2*, but not Dectin-1, to bind branched  $\beta$ 1,3/ $\beta$ 1,6 oligosaccharides. The glucose linkages are symbolically indicated by diagrams in the top panel; for probe 157 the internal 1,3 linkage has an  $\alpha$ -configuration. For probes 6, 8-13 glucose chain lengths of the major components are depicted.



**Fig. S10:** STD NMR analyses of CBMs with  $\beta$ 1,3-linked trisaccharide Lam-3.

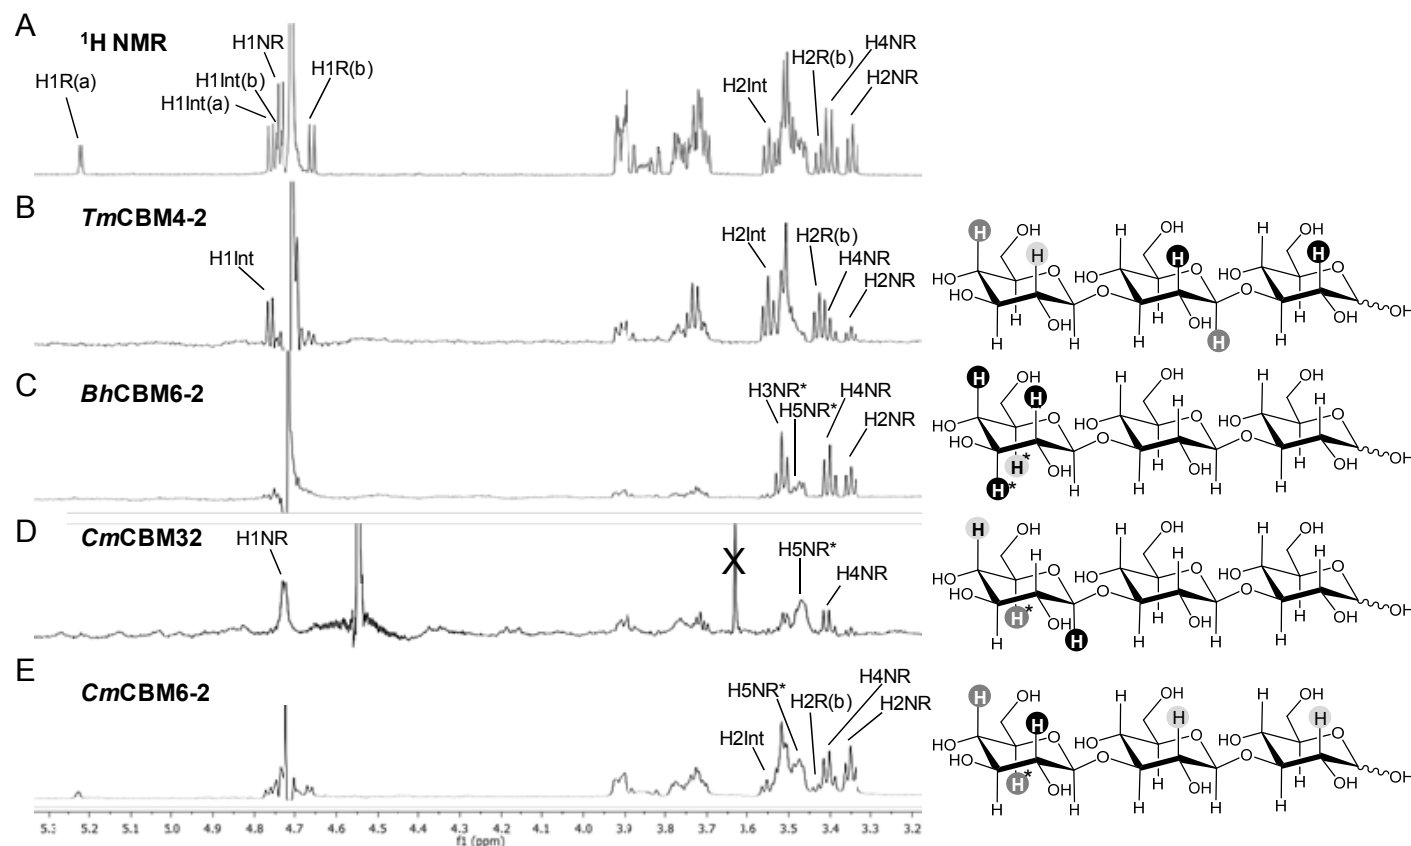

(A) Reference  $^1\text{H}$  NMR and STD spectra of Lam-3 in the presence of (B) *TmCBM4-2*, (C) *BhCBM6-2*, (D) *CmCBM32* and (E) *CmCBM6-2*. Binding epitopes implied by the STD results are shown on the right for each CBM. All the experiments were performed at 30 °C except for *CmCBM32-2* which was measured at 45 °C. The relative STD effects (highest STD signal normalized to 100%) are illustrated by dark, medium and light gray circles indicating strong (>80%), medium (40–80%), and weak (<40%) STD effects, respectively. Overlapped STD signals that could not be clearly assigned are not shown on the structures. Asterisks indicate signals for which the STD is an approximate estimate due to partial overlap.

**Table S1.** Polysaccharides examined. Some of the glucan polysaccharides listed below were selected as sources of gluco-oligosaccharides after their partial depolymerization; reagents used for depolymerization are given. Those that were soluble, polysaccharides ID 1-12, were printed non-covalently onto nitrocellulose-coated slides and analyzed for binding with the proteins investigated as shown in [supplemental Fig. S1](#).

| ID | Polysaccharide                                          | Predominant oligosaccharide sequence                                                          | Mean molecular mass <sup>1</sup> | Source                                     | Reference | Reagents used for depolymerization                       |
|----|---------------------------------------------------------|-----------------------------------------------------------------------------------------------|----------------------------------|--------------------------------------------|-----------|----------------------------------------------------------|
| 1  | Dextran                                                 | $\alpha$ 1,6-glucose                                                                          | 150 kDa                          | <i>Leuconostoc mesenteroides</i> (Sigma)   | (19)      | Acid (0.1 M HCl) hydrolysis                              |
| 2  | Pullulan                                                | Mixed $\alpha$ 1,4/ $\alpha$ 1,6-glucose                                                      | -                                | <i>P. pullulans</i> (Megazyme)             | (20)      |                                                          |
| 3  | Cyclic- $\beta$ -glucan                                 | $\beta$ 1,2-glucose                                                                           | 3-4 kDa                          | <i>Brucella</i> spp.                       | (14,21)   | Acid (0.01 M HCl) hydrolysis                             |
| 4  | Curdlan <sup>2</sup>                                    | $\beta$ 1,3-glucose                                                                           | -                                | <i>Agrobacterium</i> sp. ATCC31749         | (22)      | Enzyme ( <i>endo</i> -1,3- $\beta$ -glucanase) digestion |
| 5  | Laminarin                                               | Linear $\beta$ 1,3-glucose backbone with occasional monoglucosyl $\beta$ 1,6-glucose branches | 7.7 kDa                          | <i>Laminaria digitata</i> (Sigma)          | (23)      |                                                          |
| 6  | Neutral soluble $\beta$ -glucan (NSG)                   |                                                                                               | 10-20 kDa                        | <i>Saccharomyces cerevisiae</i> (Biothera) | (24)      |                                                          |
| 7  | Poly-(1,6)-D-glucopyranosyl-(1,3)-D-glucopyranose (PGG) |                                                                                               | 120-205 kDa                      | <i>S. cerevisiae</i> (Biothera)            | (25)      |                                                          |
| 8  | Lentinan                                                |                                                                                               | 580 kDa                          | <i>Lentinus edodes</i>                     | (16)      | Acid (0.02M TFA) hydrolysis                              |
| 9  | Grifolan                                                | $\beta$ 1,3-glucose backbone with highly ramified oligomeric $\beta$ 1,6-glucose branches     | 95 kDa                           | <i>Grifola frondosa</i>                    | (15)      | Acid (0.02M TFA) hydrolysis                              |
| 10 | Barley glucan                                           | Mixed $\beta$ 1,3/ $\beta$ 1,4-glucose                                                        | 190 kDa                          | Barley flour (Megazyme)                    | (26)      | Enzyme (lichenase) digestion                             |
| 11 | Pustulan                                                | $\beta$ 1,6-glucose                                                                           | 20 kDa                           | <i>Umbilicaria papullosa</i> (Calbiochem)  | (27)      | Acid (0.2 M HCl) hydrolysis                              |
| 12 | Mannan                                                  | $\alpha$ 1,6-mannose                                                                          | -                                | <i>S. cerevisiae</i> (Sigma)               | (19)      |                                                          |
| 13 | Poria cocos glucan                                      | $\alpha$ 1,3-glucose                                                                          | 80-570 kDa                       | <i>Poria cocos</i> mycelia                 | (1)       | Acid (0.01 M TFA) hydrolysis                             |

<sup>1</sup>Where known

<sup>2</sup>Curdlan polysaccharide was solubilized in an alkaline aqueous solution (50mM NaOH) prior printing.

**Table S2.** Glucan-recognizing proteins investigated and their reported oligosaccharide recognition.

| Proteins                                                                                                           | Oligosaccharides                                                                                                                                                                                                                                                                                                                                                                                                                  |
|--------------------------------------------------------------------------------------------------------------------|-----------------------------------------------------------------------------------------------------------------------------------------------------------------------------------------------------------------------------------------------------------------------------------------------------------------------------------------------------------------------------------------------------------------------------------|
| <b>Mammalian lectin receptors of immune system</b>                                                                 |                                                                                                                                                                                                                                                                                                                                                                                                                                   |
| <b>Dectin-1</b><br>Dendritic cell-associated C-type like lectin-1 (CLEC7A)                                         | Linear $\beta$ 1,3 gluco-oligosaccharides, DP-10 and longer (microarray analysis)(28,29)<br>Synthetic $\beta$ 1,3-linked linear gluco-octasaccharide with a $\beta$ 1,6-linked mono-glucosyl branch (SPR/inhibition of binding to glucanphosphate)(7)<br>Synthetic $\beta$ 1,3-linked linear gluco-hexadecasaccharide with or without a $\beta$ 1,6-linked mono-glucosyl branch (ELISA/inhibition of binding to schizophyllan)(8) |
| <b>DC-SIGN</b><br>Dendritic cell-specific ICAM-3-grabbing non-integrin                                             | N-linked high-mannose oligosaccharides and fuco-oligosaccharides (Lewis <sup>a</sup> , Lewis <sup>x</sup> , Lewis <sup>y</sup> )(30,31)<br>$\alpha$ 1,4-, $\beta$ 1,4- and $\beta$ 1,3-linked gluco-disaccharides (inhibition of binding to gp120 and binding)(32)<br>$\alpha$ 1,4-linked gluco-disaccharide and tetrasaccharide (binding to neoglycoconjugates using DC-SIGN expressing cells)(33)                               |
| <b><math>\alpha</math>-glucan antibodies</b>                                                                       |                                                                                                                                                                                                                                                                                                                                                                                                                                   |
| <b>MOPC myeloma 104-E-IgM</b>                                                                                      | Linear $\alpha$ 1,3 di- to penta gluco-oligosaccharides (inhibition of dextran precipitation)(34)                                                                                                                                                                                                                                                                                                                                 |
| <b>16.412E-IgA</b><br>Anti-dextran<br>(isomaltosyl hexasaccharide- keyhole limpet hemocyanin)<br>‘Cavity-type’     | Linear $\alpha$ 1,6 gluco-oligosaccharides > DP-3 (inhibition of binding to dextran)(35,36)<br>Linear $\alpha$ 1,6 gluco-tri- and hexasaccharides (binding to protein-conjugates)(11)                                                                                                                                                                                                                                             |
| <b>3.4.1G6-IgG3</b><br>Anti-dextran (isomaltosyl tetrasaccharide-stearylamine)<br>‘Groove-type’                    | Linear $\alpha$ 1,6 oligosaccharides (inhibition of binding to dextran);<br>Chain length requirement (>DP-5)(37)                                                                                                                                                                                                                                                                                                                  |
| <b><math>\beta</math>-glucan antibodies</b>                                                                        |                                                                                                                                                                                                                                                                                                                                                                                                                                   |
| <b>2G8-IgG</b><br>Vaccine-induced with <i>Candida albicans</i><br>$\beta$ -glucan polysaccharide (Protective)      | Linear $\beta$ 1,3 gluco-oligosaccharides >DP-4 (microarray analysis)(12,38)                                                                                                                                                                                                                                                                                                                                                      |
| <b>1H8-IgG</b><br>Vaccine-induced with <i>C. albicans</i><br>$\beta$ -glucan polysaccharide (Potential protective) | Specificity investigated in the present report                                                                                                                                                                                                                                                                                                                                                                                    |

**1E12-IgM**

Vaccine-induced with *C. albicans*  
 $\beta$ -glucan polysaccharide  
 CDR identical to that of 2G8-IgG (Non-protective)

Linear  $\beta$ 1,3-,  $\beta$ 1,4- and  $\beta$ 1,6 gluco-oligosaccharides, DP-2 and longer (microarray analysis)(12)

**Microbial CBMs****TmCBM4-2**

*Thermotoga maritima* laminarinase  
 CAZY family 4

Linear  $\beta$ 1,3 gluco-oligosaccharides, >DP- 2, peaks at DP-5  
 Binding site is a deep groove, requiring the internal oligosaccharide sequence (ITC and X-ray crystallography)(4,39)

**CmCBM32-2**

*Cellvibrio mixtus* Cellulase  
 CAZY family 32

Specificity investigated in the present report  
 Polysaccharide data available: weak binding to laminarin (linear  $\beta$ 1,3 polysaccharide with occasional  $\beta$ 1,6 branches) and pustulan (linear  $\beta$ 1,6 polysaccharide)(40)

**BhCBM6**

*Bacillus halodurans*  
 Laminarinase;CAZY family 6

Linear  $\beta$ 1,3 gluco-oligosaccharides, >DP- 2, with high affinity at DP-5 and DP-6  
 Low affinity to  $\beta$ 1,2- or  $\beta$ 1,6-linked disaccharides  
 Unique binding mode: binding site is small slot that accommodates the non-reducing end glucose residue, and the extended  $\beta$ 1,3 oligosaccharide curves around the CBM surface, explaining the increased binding with longer DP-5 and DP-6 chains.  
 (ITC and X-ray crystallography)(5)

2 independent glucan binding sites: cleft A and B

**Cleft A:**

Linear  $\beta$ 1,4-gluco-oligosaccharides, DP- 2 and longer; Linear  $\beta$ 1,4- xylose oligosaccharides (weak); Linear  $\beta$ 1,3-gluco-hexasaccharide

**Cleft B:**

Linear  $\beta$ 1,4-gluco-oligosaccharides, > DP-3;  $\beta$ 1,3; $\beta$ 1,4-linked tetrasaccharides

Glc $\beta$ 1,4 Glc $\beta$ 1,3Glc $\beta$ 1,4Glc

Glc $\beta$ 1,3 Glc $\beta$ 1,4Glc $\beta$ 1,3Glc

(ITC and X-ray crystallography) (6,41)

Strong binding to  $\beta$ 1,3; $\beta$ 1,4 gluco-tetrasaccharide

Glc $\beta$ 1,4Glc $\beta$ 1,4Glc $\beta$ 1,3Glc but not

Glc $\beta$ 1,3Glc $\beta$ 1,4Glc $\beta$ 1,3Glc

**CtCBM11**

*Clostridium thermocellum* endoglucanase; CAZY family 11

Relatively weak binding affinity to linear  $\beta$ 1,4 gluco-oligosaccharides  
 (ITC and STD-NMR)(42-44)

***TmCBM41***  
*Thermotoga maritime*  
Pullulanase; CAZY family 41

Linear  $\alpha$ 1,4 gluco-oligosaccharides, >DP-2; oligomers DP-5 to DP-7 are bound by 2 CBM molecules

Enzymatically released pullulan tetra- and heptasaccharide

$\text{Glc}\alpha$ 1,6 $\text{Glc}\alpha$ 1,4 $\text{Glc}\alpha$ 1,4Glc

$\text{Glc}\alpha$ 1,6 $\text{Glc}\alpha$ 1,4 $\text{Glc}\alpha$ 1,4 $\text{Glc}\alpha$ 1,6 $\text{Glc}\alpha$ 1,4 $\text{Glc}\alpha$ 1,4Glc

Non-reducing end  $\text{Glc}\alpha$ 1,6 and internal  $\text{Glc}\alpha$ 1,6-linkage are tolerated,  $\text{Glc}\alpha$ 1,4 $\text{Glc}\alpha$ 1,6Glc not tested

(ITC and X-ray crystallography )(45,46)

---

**Table S3.** Gluco-oligosaccharides used for development of ESI-CID-MS/MS method.

| Designations <sup>1</sup>                           | Sequences                                                                                                                                                                                                                                                                                                  |
|-----------------------------------------------------|------------------------------------------------------------------------------------------------------------------------------------------------------------------------------------------------------------------------------------------------------------------------------------------------------------|
| <i>Linear heptasaccharides with homo-linkages</i>   |                                                                                                                                                                                                                                                                                                            |
| Cyano-7                                             | Glc $\alpha$ 1,2Glc $\alpha$ 1,2Glc $\alpha$ 1,2Glc $\alpha$ 1,2Glc $\alpha$ 1,2Glc $\alpha$ 1,2Glc                                                                                                                                                                                                        |
| C $\beta$ G-7                                       | Glc $\beta$ 1,2Glc $\beta$ 1,2Glc $\beta$ 1,2Glc $\beta$ 1,2Glc $\beta$ 1,2Glc $\beta$ 1,2Glc                                                                                                                                                                                                              |
| Poria-7                                             | Glc $\alpha$ 1,3Glc $\alpha$ 1,3Glc $\alpha$ 1,3Glc $\alpha$ 1,3Glc $\alpha$ 1,3Glc $\alpha$ 1,3Glc                                                                                                                                                                                                        |
| Lam-7                                               | Glc $\beta$ 1,3Glc $\beta$ 1,3Glc $\beta$ 1,3Glc $\beta$ 1,3Glc $\beta$ 1,3Glc $\beta$ 1,3Glc                                                                                                                                                                                                              |
| Malto-7                                             | Glc $\alpha$ 1,4Glc $\alpha$ 1,4Glc $\alpha$ 1,4Glc $\alpha$ 1,4Glc $\alpha$ 1,4Glc $\alpha$ 1,4Glc                                                                                                                                                                                                        |
| Cello-7                                             | Glc $\beta$ 1,4Glc $\beta$ 1,4Glc $\beta$ 1,4Glc $\beta$ 1,4Glc $\beta$ 1,4Glc $\beta$ 1,4Glc                                                                                                                                                                                                              |
| Dext-7                                              | Glc $\alpha$ 1,6Glc $\alpha$ 1,6Glc $\alpha$ 1,6Glc $\alpha$ 1,6Glc $\alpha$ 1,6Glc $\alpha$ 1,6Glc                                                                                                                                                                                                        |
| Pust-7                                              | Glc $\beta$ 1,6Glc $\beta$ 1,6Glc $\beta$ 1,6Glc $\beta$ 1,6Glc $\beta$ 1,6Glc $\beta$ 1,6Glc                                                                                                                                                                                                              |
| <i>Linear oligosaccharides with hetero-linkages</i> |                                                                                                                                                                                                                                                                                                            |
| Pano-3                                              | Glc $\alpha$ 1,6Glc $\alpha$ 1,4Glc                                                                                                                                                                                                                                                                        |
| i-Pano-3                                            | Glc $\alpha$ 1,4Glc $\alpha$ 1,6Glc                                                                                                                                                                                                                                                                        |
| Pullu-4                                             | Glc $\alpha$ 1,6Glc $\alpha$ 1,4Glc $\alpha$ 1,4Glc                                                                                                                                                                                                                                                        |
| Pullu-7                                             | Glc $\alpha$ 1,6Glc $\alpha$ 1,4Glc $\alpha$ 1,4Glc $\alpha$ 1,6Glc $\alpha$ 1,4Glc $\alpha$ 1,4Glc                                                                                                                                                                                                        |
| Barley-4a                                           | Glc $\beta$ 1,3Glc $\beta$ 1,4Glc $\beta$ 1,4Glc                                                                                                                                                                                                                                                           |
| Barley-4b                                           | Glc $\beta$ 1,4Glc $\beta$ 1,4Glc $\beta$ 1,3Glc                                                                                                                                                                                                                                                           |
| Barley-4c                                           | Glc $\beta$ 1,4Glc $\beta$ 1,3Glc $\beta$ 1,4Glc                                                                                                                                                                                                                                                           |
| <i>Branched decasaccharides</i>                     |                                                                                                                                                                                                                                                                                                            |
| HE10 <sup>B2</sup>                                  | Glc $\beta$ 1,3Glc $\beta$ 1,3Glc<br><div style="text-align: right; margin-right: 100px;"> <br/>Glc<math>\beta</math>1,6</div>                                                                                   |
| HE-10 <sup>B3</sup>                                 | Glc $\beta$ 1,3Glc $\beta$ 1,3Glc $\beta$ 1,3Glc $\beta$ 1,3Glc $\beta$ 1,3Glc $\beta$ 1,3Glc $\beta$ 1,3Glc<br><div style="text-align: right; margin-right: 100px;"> <br/>Glc<math>\beta</math>1,6</div>                                                                                                  |
| HE-10 <sup>B5</sup>                                 | Glc $\beta$ 1,3Glc $\beta$ 1,3Glc $\beta$ 1,3Glc $\beta$ 1,3Glc $\beta$ 1,3Glc $\beta$ 1,3Glc $\beta$ 1,3Glc<br><div style="text-align: right; margin-right: 100px;"> <br/>Glc<math>\beta</math>1,6</div>                                                                                                  |
| HE-10 <sup>B7</sup>                                 | Glc $\beta$ 1,3Glc $\beta$ 1,3Glc $\beta$ 1,3Glc $\beta$ 1,3Glc $\beta$ 1,3Glc $\beta$ 1,3Glc $\beta$ 1,3Glc<br><div style="text-align: right; margin-right: 100px;"> <br/>Glc<math>\beta</math>1,6</div>                                                                                                  |
| <i>Double-branched oligosaccharides</i>             |                                                                                                                                                                                                                                                                                                            |
| HE-11 <sup>B2/6</sup>                               | Glc $\beta$ 1,3Glc $\beta$ 1,3Glc $\beta$ 1,3Glc $\beta$ 1,3Glc $\beta$ 1,3Glc $\beta$ 1,3Glc $\beta$ 1,3Glc<br><div style="text-align: center; margin: 0 auto 100px auto;"> <br/>Glc<math>\beta</math>1,6</div> <div style="text-align: right; margin-right: 100px;"> <br/>Glc<math>\beta</math>1,6</div> |

<sup>1</sup>Monosaccharide contents of oligosaccharides are given as Arab numerals.

**Table S4.**  $^1\text{H}$  NMR assignments for Barley-5a (Glc $\beta$ 1,3Glc $\beta$ 1,4Glc $\beta$ 1,6Glc $\beta$ 1,4Glc) in  $\text{D}_2\text{O}$  at 30 °C.

|     | Chemical shifts in ppm |                |                |              |               |              |
|-----|------------------------|----------------|----------------|--------------|---------------|--------------|
|     | Glc $\beta$ 1          | 3Glc $\beta$ 1 | 4Glc $\beta$ 1 | 6Glc $\beta$ | 4Glc $\alpha$ | 4Glc $\beta$ |
| H1  | 4.73                   | 4.53           | 4.53           | 4.51         | 5.21          | 4.65         |
| H2  | 3.33                   | 3.50           | 3.34           | 3.32         | 3.56          | 3.28         |
| H3  | 3.51                   | 3.75           | 3.61           | 3.49         | 3.82          | 3.59         |
| H4  | 3.39                   | 3.51           | 3.65           | 3.49         | 3.63          | 3.62         |
| H5  | 3.47                   | 3.51           | 3.58           | 3.65         | 3.85          | 3.58         |
| H6  | 3.91                   | 3.91           | 3.97           | <b>4.20</b>  | 3.94          | 3.95         |
| H6' | 3.71                   | 3.75           | 3.81           | <b>3.88</b>  | 3.87          | 3.80         |

**Table S5.**  $^1\text{H}$  and  $^{13}\text{C}$  assignments for the Poriaco-7 fraction containing  $\alpha$ 1,3-linked Glc with a minor component of  $\alpha$ 1,4-linked glucan, in  $\text{D}_2\text{O}$  at 30 °C.

|      | Chemical shifts in ppm |              |                     |              |
|------|------------------------|--------------|---------------------|--------------|
|      | $\alpha$ 1→3 linked    |              | $\alpha$ 1→4 linked |              |
|      | $^{13}\text{C}$        | $^1\text{H}$ | $^{13}\text{C}$     | $^1\text{H}$ |
| C/H1 | 102.1                  | 5.36         | 102.4               | 5.38         |
| C/H2 | 73.0                   | 3.67         | 74.4                | 3.63         |
| C/H3 | 83.0                   | 3.89         | 76.1                | 3.96         |
| C/H4 | 72.4                   | 3.42         | 79.7                | 3.66         |
| C/H5 | 74.4                   | 4.03         | 74.0                | 3.83         |
| C/H6 | 63.1                   | 3.83         | 63.3                | 3.87         |
|      |                        | 3.77         |                     | 3.71         |



**Table S6A.** MALDI-MS analysis of NGLs derived from gluco-oligosaccharides or fractions with homo-linkages.

| Fraction | Glucose units <sup>1</sup> | Calculated mass <sup>2</sup> |                    | Molecular ions Detected <sup>3,4</sup> |                              |                            |                     |                     |                           |                     |                     |                   |                    |                    |                    |                   |                   |                   |
|----------|----------------------------|------------------------------|--------------------|----------------------------------------|------------------------------|----------------------------|---------------------|---------------------|---------------------------|---------------------|---------------------|-------------------|--------------------|--------------------|--------------------|-------------------|-------------------|-------------------|
|          |                            | M+Na <sup>+</sup>            | [M-H] <sup>-</sup> | Cyano- (α1,2) <sup>5</sup>             | Poriaco- (α1,3) <sup>6</sup> | Malto- (α1,4) <sup>6</sup> | Dext- (α1,6)        | CβG- (β1,2)         | Curd- (β1,3) <sup>6</sup> | Cello- (β1,4)       | Pust- (β1,6)        |                   |                    |                    |                    |                   |                   |                   |
| 2        | Glc2                       | 1083.67                      | 1059.67            | 1083.8 (Glc2)                          | 1083.6 (Glc2)*               | 1059.8 (Glc2)*             | 1059.9 (Glc2)       | 1083.7 (Glc2)       | 1059.7 (Glc2)*            | 1083.9 (Glc2)       | 1083.9 (Glc2)       |                   |                    |                    |                    |                   |                   |                   |
| 3        | Glc3                       | 1245.72                      | 1221.72            | 1245.6 (Glc3)                          | 1245.9 (Glc3)                | 1221.9 (Glc3)*             | 1221.4 (Glc3)       | 1245.9 (Glc3)       | 1221.6 (Glc3)*            | 1246.1 (Glc3)       | 1246.1 (Glc3)       |                   |                    |                    |                    |                   |                   |                   |
| 4        | Glc4                       | 1407.77                      | 1383.78            | 1047.7 (Glc4)                          | 1408.1 (Glc4)                | 1383.6 (Glc4)*             | 1383.8 (Glc4)       | 1407.8 (Glc4)       | 1383.7 (Glc4)*            | 1408.2 (Glc4)       | 1408.1 (Glc4)       |                   |                    |                    |                    |                   |                   |                   |
| 5        | Glc5                       | 1569.83                      | 1545.83            | 1569.6 (Glc5)                          | 1570.2 (Glc5)                | 1545.3 (Glc5)*             | 1545.7 (100; Glc5)  | 1569.6 (100; Glc5)  | 1545.6 (Glc5)*            | 1570.1 (100; Glc5)  | 1570.1 (Glc5)       |                   |                    |                    |                    |                   |                   |                   |
| 6        | Glc6                       | 1731.88                      | 1707.88            | 1731.7 (100;Glc6)<br>1569.7 (12;Glc5)  | 1732.1 (Glc6)                | 1707.4 (Glc6)*             | 1383.7 (18; Glc4)   | 1731.7 (11; Glc6)   | 1707.5 (100; Glc6)*       | 1732.1 (100; Glc6)  | 1732.1 (Glc6)       |                   |                    |                    |                    |                   |                   |                   |
|          |                            |                              |                    |                                        |                              |                            | 1707.6 (100; Glc6)  | 1732.0 (100; Glc6)  |                           |                     |                     | 1869.5 (30; Glc7) | 1570.1 (35; Glc5)  |                    |                    |                   |                   |                   |
| 7        | Glc7                       | 1893.93                      | 1869.93            | 1893.9 (100;Glc7)<br>1731.8 (12;Glc6)  | 1894.2 (Glc7)                | 1869.4 (Glc7)*             | 1870.0 (Glc7)       | 1894.1 (100; Glc7)  | 1894.2 (Glc7)*            | 1894.0 (100; Glc7)  | 1894.1 (Glc7)       |                   |                    |                    |                    |                   |                   |                   |
|          |                            |                              |                    |                                        |                              |                            |                     | 2056.1 (43; Glc8)   |                           |                     |                     | 1732.0 (32; Glc6) |                    |                    |                    |                   |                   |                   |
| 8        | Glc8                       | 2055.99                      | 2031.99            | 2055.9 (Glc8)                          | 2055.9 (100; Glc8)           | 2031.6 (100; Glc8)         | 2031.7 (100; Glc8)  | 2055.9 (100; Glc8)  | 2031.9 (100; Glc8)        | 2056.0 (100; Glc8)  | 2055.9 (100; Glc8)  |                   |                    |                    |                    |                   |                   |                   |
|          |                            |                              |                    |                                        |                              |                            |                     | 1893.8 (15;Glc7)    |                           |                     |                     | 1869.9 (90; Glc7) | 1894.0 (35;Glc7)   | 1893.8 (40;Glc7)   |                    |                   |                   |                   |
|          |                            |                              |                    |                                        |                              |                            |                     | 2217.9 (10;Glc9)    |                           |                     |                     | 2193.8 (32; Glc9) | 2194.0 (40; Glc9)  | 2217.9 (17;Glc9)   |                    |                   |                   |                   |
| 9        | Glc9                       | 2218.04                      | 2194.04            | 2217.4 (Glc9)                          | 2218.0 (100;Glc9)            | 2194.2 (100;Glc9)          | 2194.3 (100;Glc9)   | 2217.9 (100;Glc9)   | 2193.9 (100; Glc9)        | 2217.9 (100; Glc9)  | 2218.2 (100;Glc9)   |                   |                    |                    |                    |                   |                   |                   |
|          |                            |                              |                    |                                        |                              |                            |                     | 2055.9 (20;Glc8)    |                           |                     |                     | 2356.3 (37;Glc10) | 2031.9 (85;Glc8)   | 2055.9 (48;Glc8)   | 2056.2 (60;Glc8)   |                   |                   |                   |
|          |                            |                              |                    |                                        |                              |                            |                     | 1893.8 (15;Glc7)    |                           |                     |                     | 2031.0 (12;Glc8)  | 2032.4 (18;Glc8)   | 2056.0 (30;Glc10)  | 2380.0 (17;Glc10)  | 2380.3 (20;Glc10) |                   |                   |
| 10       | Glc10                      | 2380.09                      | 2356.09            | –                                      | 2380.1 (100;Glc10)           | 2356.0 (100; Glc10)        | 2356.3 (100; Glc10) | 2380.0 (100; Glc10) | 2355.9 (100; Glc10)       | 2380.1 (100; Glc10) | 2380.2 (100; Glc10) |                   |                    |                    |                    |                   |                   |                   |
|          |                            |                              |                    |                                        |                              |                            |                     | 2218.1 (70;Glc9)    |                           |                     |                     | 2518.2 (65;Glc11) | 2518.3 (33;Glc11)  | 2543.0 (78;Glc11)  | 2218.2 (85;Glc9)   |                   |                   |                   |
|          |                            |                              |                    |                                        |                              |                            |                     | 2055.9 (20;Glc8)    |                           |                     |                     | 2194.0 (48;Glc9)  | 2194.3 (22;Glc9)   | 2517.9 (33;Glc11)  | 2542.3 (25;Glc11)  | 2704.5 (15;Glc12) |                   |                   |
| 11       | Glc11                      | 2542.14                      | 2518.15            | –                                      | 2542.8 (100; Glc11)          | 2518.0 (100;Glc11)         | 2518.4 (100; Glc11) | 2541.7 (100; Glc11) | 2517.8 (100; Glc11)       | 2542.1 (100; Glc11) | 2542.3 (100; Glc11) |                   |                    |                    |                    |                   |                   |                   |
|          |                            |                              |                    |                                        |                              |                            |                     | 2704.4 (50;Glc12)   |                           |                     |                     | 2680.3 (35;Glc12) | 2704.6 (27; Glc12) | 2355.7 (48; Glc10) | 2380.1 (55;Glc10)  | 2380.2 (85;Glc10) |                   |                   |
|          |                            |                              |                    |                                        |                              |                            |                     | 2866.2 (45;Glc13)   |                           |                     |                     | 2355.8 (30;Glc10) | 2356.5 (25;Glc10)  | 2380.7 (13;Glc10)  | 2679.9 (28; Glc12) | 2218.1 (20;Glc9)  | 2651.3 (80;Glc12) |                   |
|          |                            |                              |                    |                                        |                              |                            |                     | 3028.1 (30;Glc14)   |                           |                     |                     | 2379.7 (13;Glc10) |                    |                    |                    | 2704.1 (12;Glc12) |                   |                   |
|          |                            |                              |                    |                                        |                              |                            |                     |                     |                           |                     |                     |                   |                    |                    |                    |                   |                   |                   |
| 12       | Glc12/15 <sup>7</sup>      | 2704.20                      | 2680.20            | –                                      | 2704.5 (100;Glc12)           | 2680.1 (100;Glc12)         | 2680.5 (100; Glc12) | 2704.7 (100;Glc12)  | 2679.6 (100; Glc12)       | 2704.2 (100; Glc12) | 3191.1 (100; Glc15) |                   |                    |                    |                    |                   |                   |                   |
|          |                            |                              |                    |                                        |                              |                            |                     | 3190.36             |                           |                     |                     | 3028.2 (90;Glc14) | 2518.0 (70;Glc11)  | 2866.5 (62; Glc13) | 2517.6 (30;Glc11)  | 2542.2 (52;Glc11) | 3029.0 (95;Glc14) |                   |
|          |                            |                              |                    |                                        |                              |                            |                     | 3166.37             |                           |                     |                     | 2866.4 (53;Glc13) | 2842.3 (48;Glc13)  | 2842.5 (28; Glc13) | 2542.8 (16;Glc11)  | 2841.6 (15;Glc13) | 2866.2 (30;Glc13) | 2866.1 (60;Glc13) |
|          |                            |                              |                    |                                        |                              |                            |                     |                     |                           |                     |                     | 2542.5 (40;Glc11) | 3189.3 (30;Glc15)  |                    |                    | 2380.5 (20;Glc10) |                   |                   |
|          |                            |                              |                    |                                        |                              |                            |                     |                     |                           |                     |                     |                   |                    |                    |                    |                   |                   |                   |
| 13       | Glc13/15 <sup>7</sup>      | 2866.25                      | 2842.25            | –                                      | 2866.1 (100;Glc13)           | 2842.3 (100; Glc13)        | 2842.6 (100; Glc13) | 2866.3 (100; Glc13) | 2842.4 (100;Glc13)        | 2866.3 (100; Glc13) | 3190.8 (100; Glc15) |                   |                    |                    |                    |                   |                   |                   |
|          |                            |                              |                    |                                        |                              |                            |                     | 3190.36             |                           |                     |                     | 3189.7 (80;Glc15) | 2680.3 (47;Glc12)  | 3004.6 (28;Glc14)  | 3028.3 (88;Glc14)  | 2680.4 (78;Glc12) | 2704.3 (68;Glc12) | 3352.7 (80;Glc16) |
|          |                            |                              |                    |                                        |                              |                            |                     |                     |                           |                     |                     | 3352.6 (50;Glc16) | 3004.4 (45;Glc14)  |                    | 2704.4 (15; Glc12) | 3004.4 (25;Glc14) | 2542.3 (28;Glc11) | 3028.7 (98;Glc14) |
|          |                            |                              |                    |                                        |                              |                            |                     |                     |                           |                     |                     | 3028.6 (33;Glc14) |                    |                    |                    |                   | 3028.3 (25;Glc14) |                   |
|          |                            |                              |                    |                                        |                              |                            |                     |                     |                           |                     |                     | 2703.2 (45;Glc12) |                    |                    |                    |                   |                   |                   |

<sup>1</sup>Glucose units or degree of polymerization (DP) for the major components in each fraction; <sup>2</sup>Calculated masses for major components are given; <sup>3</sup>Positive-ion MALDI-MS was used for the analysis of AO-NGLs of cyano-, poriac-, CβG-, cello- and pustulan-series and MNa<sup>+</sup> were detected, whereas negative-ion MALDI-MS was used for the analysis of AO-NGLs of malto-, dextran- and curdlan-series and [M-H]<sup>-</sup> were detected; <sup>4</sup>Shown in brackets are assigned glucose units; and where multiple components were detected, relative intensities of ions greater 10% are given; <sup>5</sup>Nomenclature of the oligosacchide moieties correspond to the polysaccharide origins; <sup>6</sup>Disaccharides and malto- and curdlan oligosaccharides from commercial sources are asterisked; <sup>7</sup>For the β1,6-linked pustulan series the major components of these fractions are oligomers with DP-15.

**Table S6B.** MALDI-MS analysis of NGLs derived from gluco-oligosaccharides or fractions with hetero-linkages.

| Fractions | Glucose units <sup>1</sup> | Calculated <sup>2</sup> mass MNa <sup>+</sup> | Molecular ions Detected <sup>3,4</sup>                                                |                                                                 |                                                                                       |
|-----------|----------------------------|-----------------------------------------------|---------------------------------------------------------------------------------------|-----------------------------------------------------------------|---------------------------------------------------------------------------------------|
|           |                            |                                               | Barley-(β1-3,1-4)                                                                     | Grifo-(β1-3/1-6)                                                | Lenti -(β1-3/1-6)                                                                     |
| 2         | Glc2                       | 1083.67                                       | –                                                                                     | –                                                               | 1083.8 (Glc2)                                                                         |
| 3         | Glc3                       | 1245.72                                       | 1241.6 (Glc3)                                                                         | 1245.9 (100; Glc3 )<br>1408.0 (12)                              | 1245.8 (Glc3)                                                                         |
| 4         | Glc4                       | 1407.77                                       | 1408.1 (Glc4)                                                                         | 1408.0 (100; Glc4)<br>1246.0 (18; Glc3)<br>1570.0 (10; Glc5)    | 1407.7 (100; Glc4)<br>1569.7 (12; Glc5)                                               |
| 5         | Glc5                       | 1569.83                                       | 1569.9 (100; Glc5)<br>1731.9 (38; Glc6)<br>1407.9 (12; Glc4)                          | 1570.2 (100; Glc5)<br>1408.1 (15; Glc4)<br>1732.2 (11; Glc6)    | 1570.0 (100; Glc5)                                                                    |
| 6         | Glc6                       | 1731.88                                       | 1731.7 (100; Glc6)<br>1569.7 (19; Glc5)                                               | 1703.8 (100; Glc6)<br>1569.6 (23; Glc5)<br>1893.0 (12; Glc7)    | 1732.0 (100; Glc6)<br>1569.9 (20; Glc5)                                               |
| 7         | Glc7                       | 1893.93                                       | 1893.6 (100; Glc7)<br>1731.8 (32; Glc6)                                               | 1894.2 (100; Glc7)<br>1732.2 (22; Glc6)<br>2056.2 (20; Glc8)    | 1893.9 (100; Glc7)<br>1731.9 (32; Glc6)                                               |
| 8         | Glc8                       | 2055.99                                       | 2055.6 (100; Glc8)<br>1893.6 (32; Glc7)<br>2217.6 (23; Glc9)                          | 2056.2 (100; Glc8)<br>2219.2 (19; Glc9)<br>1894.2 (17; Glc7)    | 2055.8 (100; Glc8)<br>1893.9 (27; Glc7)                                               |
| 9         | Glc9                       | 2218.04                                       | 2218.3 (100; Glc9)<br>2055.4 (12; Glc8)                                               | 2218.1 (100; Glc9)<br>2056.1 (32; Glc8)<br>2380.0 (20; Glc10)   | 2217.8 (100; Glc9)<br>2379.7 (85; Glc10)<br>2055.9 (30; Glc8)<br>2541.7 (13; Glc11)   |
| 10        | Glc10                      | 2380.09                                       | 2380.7 (100; Glc10)<br>2218.8 (45; Glc9)                                              | 2380.1 (100; Glc10)<br>2218.2 (33; Glc9)<br>2542.1 (25; Glc11)  | 2379.9 (100; Glc10)<br>2217.8 (75; Glc9)<br>2056.0 (32; Glc8)<br>2541.9 (15; Glc11)   |
| 11        | Glc11                      | 2542.14                                       | 2542.6 (100; Glc11)<br>2704.6 (48; Glc12)<br>2380.6 (47; Glc10)                       | 2542.0 (100; Glc11)<br>2380.0 (45; Glc10)<br>2703.9 (19; Glc12) | 2541.8 (100; Glc11)<br>2379.9 (45; Glc10)<br>2704.5 (32; Glc12)<br>2218.8 (12; Glc9)  |
| 12        | Glc12                      | 2704.20                                       | 2705.1 (100; Glc12)<br>2542.3 (45; Glc11)<br>2866.9 (28; Glc13)                       | 2703.9 (100; Glc12)<br>2543.0 (77; Glc11)<br>2865.7 (52; Glc13) | 2703.7 (100; Glc12)<br>2866.5 (48; Glc13)<br>2541.8 (45; Glc11)<br>2379.6 (14; Glc10) |
| 13        | Glc13                      | 2866.25                                       | 2867.2 (100; Glc13)<br>2704.2 (45; Glc12)<br>3028.8 (18; Glc14)                       | 2866.0 (100; Glc13)<br>2703.9 (62; Glc12)<br>3027.8 (30; Glc14) | 2866.1 (100; Glc13)<br>3028.0 (80; Glc14)<br>2704.6 (28; Glc12)<br>3189.7 (12; Glc15) |
| 14        | Glc14                      | 3028.30                                       | 3027.9 (100; Glc14)<br>2866.1 (53; Glc13)<br>3190.7 (38; Glc15)                       | 3028.3 (100; Glc14)<br>3190.2 (41; Glc15)<br>2866.4 (39; Glc13) | –                                                                                     |
| 15        | Glc15                      | 3190.36                                       | 3189.8 (100; Glc15)<br>3027.8 (75; Glc14)<br>3352.7 (40; Glc16)<br>2866.1 (25; Glc13) | 3190.4 (100; Glc15)<br>3352.9 (50; Glc16)<br>3028.3 (35; Glc14) | –                                                                                     |
| 16        | Glc16                      | 3352.41                                       | 3352.8 (100; Glc16)<br>3190.0 (58; Glc15)<br>3512.7 (37; Glc17)                       | 3352.0 (100; Glc16)<br>3514.3 (54; Glc17)<br>3190.9 (48; Glc15) | –                                                                                     |

<sup>1</sup>Glucose units or degree of polymerization (DP) for the major components in each fraction.

<sup>2</sup>Calculated masses for major components are given.

<sup>3</sup>Positive-ion MALDI-MS was used for the analysis and MNa<sup>+</sup> was detected.

<sup>4</sup>Shown in brackets are assigned glucose units; and where multiple components were detected, relative intensities of ions greater 10% are given.

**Table S6C.** MALDI-MS analysis of NGLs prepared from additional commercial and chemically synthesized gluco-oligosaccharides.

| Oligosaccharide designations | Glucose units | Calculated mass M+Na <sup>+</sup> | Detected Ions <sup>1,2</sup> |
|------------------------------|---------------|-----------------------------------|------------------------------|
| Pano-3                       | Glc3          | 1245.72                           | 1245.9 (Glc3)                |
| i-Pano-3                     | Glc3          | 1245.72                           | 1245.5 (Glc3)                |
| Pullu-4                      | Glc4          | 1407.77                           | 1407.9 (Glc4)                |
| Pullu-7                      | Glc7          | 1893.93                           | 1893.9 (Glc7)                |
| Barley-3a                    | Glc3          | 1245.72                           | 1245.6 (Glc3)                |
| Barley-3b                    | Glc3          | 1245.72                           | 1245.7 (Glc3)                |
| Barley-4a                    | Glc4          | 1407.77                           | 1407.8 (Glc4)                |
| Barley-4b                    | Glc4          | 1407.77                           | 1407.6 (Glc4)                |
| Barley-4c                    | Glc4          | 1407.77                           | 1407.8 (Glc4)                |
| Barley-5a                    | Glc5          | 1569.83                           | 1570.0 (Glc5)                |
| Barley-6a                    | Glc6          | 1731.88                           | 1731.8 (Glc6)                |
| HE-8                         | Glc8          | 2055.99                           | 2055.7 (Glc8)                |
| HE-9                         | Glc9          | 2218.04                           | 2218.0 (Glc9)                |
| HE-10                        | Glc10         | 2380.09                           | 2380.1 (Glc10)               |
| HE-9 <sup>B7</sup>           | Glc9          | 2218.04                           | 2217.9 (Glc9)                |
| HE-10 <sup>B2</sup>          | Glc10         | 2380.09                           | 2380.0 (Glc10)               |
| HE-10 <sup>B3</sup>          | Glc10         | 2380.09                           | 2379.9 (Glc10)               |
| HE-10 <sup>B5</sup>          | Glc10         | 2380.09                           | 2379.7 (Glc10)               |
| HE-10 <sup>B7</sup>          | Glc10         | 2380.09                           | 2380.3 (Glc10)               |
| HE-11 <sup>B3/6</sup>        | Glc11         | 2542.14                           | 2542.0 (Glc11)               |
| JG-6 <sup>B1/3</sup>         | Glc6          | 1731.88                           | 1731.7 (Glc6)                |

<sup>1</sup>Positive-ion MALDI-MS was used for the analysis and MNa<sup>+</sup> were detected.

<sup>2</sup>Shown in brackets are the assigned glucose compositions.

**Table S7A.** Oligosaccharide NGL probes included in the gluco-oligosaccharide microarrays, sorted by linkage type and degree of polymerization.

| ID <sup>1</sup> | Linkage and sources                                    | Probe designation <sup>3</sup> | Probe Sequence <sup>4,5</sup>                                                                                                                                                               |
|-----------------|--------------------------------------------------------|--------------------------------|---------------------------------------------------------------------------------------------------------------------------------------------------------------------------------------------|
| 1               | Linear Xyl or Man $\beta$ 4 <sup>2</sup> Controls      | Xyl5( $\beta$ 4)               | Xyl $\beta$ -4Xyl $\beta$ -4Xyl $\beta$ -4Xyl $\beta$ -4Xyl-DH                                                                                                                              |
| 2               |                                                        | Xyl6( $\beta$ 4)               | Xyl $\beta$ -4Xyl $\beta$ -4Xyl $\beta$ -4Xyl $\beta$ -4Xyl $\beta$ -4Xyl-DH                                                                                                                |
| 3               |                                                        | Man4( $\beta$ 4)               | Man $\beta$ -4Man $\beta$ -4Man $\beta$ -4Man-DH                                                                                                                                            |
| 4               |                                                        | Man5( $\beta$ 4)               | Man $\beta$ -4Man $\beta$ -4Man $\beta$ -4Man $\beta$ -4Man-DH                                                                                                                              |
| 5               |                                                        | Man6( $\beta$ 4)               | Man $\beta$ -4Man $\beta$ -4Man $\beta$ -4Man $\beta$ -4Man $\beta$ -4Man-DH                                                                                                                |
| 6               | Linear Glc $\alpha$ 2 Cyanobacterium gluco-fructosides | Cyano-2                        | Glc $\alpha$ -2Glc-AO                                                                                                                                                                       |
| 7               |                                                        | Cyano-3                        | Glc $\alpha$ -2Glc $\alpha$ -2Glc-AO                                                                                                                                                        |
| 8               |                                                        | Cyano-4                        | Glc $\alpha$ 1-2Glc $\alpha$ 1-2Glc $\alpha$ 1-2Glc-AO                                                                                                                                      |
| 9               |                                                        | Cyano-5                        | Glc $\alpha$ 1-2Glc $\alpha$ 1-2Glc $\alpha$ 1-2Glc $\alpha$ 1-2Glc-AO                                                                                                                      |
| 10              |                                                        | Cyano-6                        | Glc $\alpha$ 1-2Glc $\alpha$ 1-2Glc $\alpha$ 1-2Glc $\alpha$ 1-2Glc $\alpha$ 1-2Glc-AO*                                                                                                     |
| 11              |                                                        | Cyano-7                        | Glc $\alpha$ 1-2Glc $\alpha$ 1-2Glc $\alpha$ 1-2Glc $\alpha$ 1-2Glc $\alpha$ 1-2Glc $\alpha$ 1-2Glc-AO*                                                                                     |
| 12              |                                                        | Cyano-8                        | Glc $\alpha$ 1-2Glc $\alpha$ 1-2Glc $\alpha$ 1-2Glc $\alpha$ 1-2Glc $\alpha$ 1-2Glc $\alpha$ 1-2Glc $\alpha$ 1-2Glc-AO                                                                      |
| 13              |                                                        | Cyano-9                        | Glc $\alpha$ 1-2Glc $\alpha$ 1-2Glc-AO                                                      |
| 14              |                                                        | Linear Glc $\alpha$ 3 Poriaco  | Nigerose                                                                                                                                                                                    |
| 15              | Poria-3                                                |                                | Glc $\alpha$ -3Glc $\alpha$ -3Glc-AO                                                                                                                                                        |
| 16              | Poria-4                                                |                                | Glc $\alpha$ 1-3Glc $\alpha$ 1-3Glc $\alpha$ 1-3Glc-AO                                                                                                                                      |
| 17              | Poria-5                                                |                                | Glc $\alpha$ -3Glc $\alpha$ -3Glc $\alpha$ -3Glc $\alpha$ -3Glc-AO                                                                                                                          |
| 18              | Poria-6                                                |                                | Glc $\alpha$ -3Glc $\alpha$ -3Glc $\alpha$ -3Glc $\alpha$ -3Glc $\alpha$ -3Glc-AO                                                                                                           |
| 19              | Poria-7                                                |                                | Glc $\alpha$ -3Glc $\alpha$ -3Glc $\alpha$ -3Glc $\alpha$ -3Glc $\alpha$ -3Glc $\alpha$ -3Glc-AO                                                                                            |
| 20              | Poria-8                                                |                                | Glc $\alpha$ -3Glc $\alpha$ -3Glc $\alpha$ -3Glc $\alpha$ -3Glc $\alpha$ -3Glc $\alpha$ -3Glc $\alpha$ -3Glc-AO*                                                                            |
| 21              | Poria-9                                                |                                | Glc $\alpha$ -3Glc $\alpha$ -3Glc-AO*                                                             |
| 22              | Poria-10                                               |                                | Glc $\alpha$ -3Glc $\alpha$ -3Glc-AO*                                              |
| 23              | Poria-11                                               |                                | Glc $\alpha$ -3Glc $\alpha$ -3Glc-AO*                               |
| 24              | Poria-12                                               |                                | Glc $\alpha$ -3Glc $\alpha$ -3Glc-AO*                |
| 25              | Poria-13                                               |                                | Glc $\alpha$ -3Glc $\alpha$ -3Glc-AO* |
| 26              |                                                        |                                | Malto-2                                                                                                                                                                                     |
| 27              |                                                        | Malto-3                        | Glc $\alpha$ -4Glc $\alpha$ -4Glc-AO                                                                                                                                                        |
| 28              |                                                        | Malto-4                        | Glc $\alpha$ -4Glc $\alpha$ -4Glc $\alpha$ -4Glc-AO                                                                                                                                         |
| 29              |                                                        | Malto-5                        | Glc $\alpha$ -4Glc $\alpha$ -4Glc $\alpha$ -4Glc $\alpha$ -4Glc-AO                                                                                                                          |



|    |                           |                                                                                 |                                                                                             |
|----|---------------------------|---------------------------------------------------------------------------------|---------------------------------------------------------------------------------------------|
| 63 |                           | CβG-11                                                                          | Glcβ1-2Glcβ1-2Glcβ1-2Glcβ1-2Glcβ1-2Glcβ1-2Glcβ1-2Glcβ1-2Glcβ1-2Glcβ1-2Glcβ1-2Glc-AO*        |
| 64 |                           | CβG-12                                                                          | Glcβ1-2Glcβ1-2Glcβ1-2Glcβ1-2Glcβ1-2Glcβ1-2Glcβ1-2Glcβ1-2Glcβ1-2Glcβ1-2Glcβ1-2Glc-AO*        |
| 65 |                           | CβG-13                                                                          | Glcβ1-2Glcβ1-2Glcβ1-2Glcβ1-2Glcβ1-2Glcβ1-2Glcβ1-2Glcβ1-2Glcβ1-2Glcβ1-2Glcβ1-2Glcβ1-2Glc-AO* |
| 66 | Linear Glcβ3<br>Curdian   | Lam-2                                                                           | Glcβ-3Glc-AO                                                                                |
| 67 |                           | Lam-3                                                                           | Glcβ-3Glcβ-3Glc-AO                                                                          |
| 68 |                           | Lam-4                                                                           | Glcβ-3Glcβ-3Glcβ-3Glc-AO                                                                    |
| 69 |                           | Lam-5                                                                           | Glcβ-3Glcβ-3Glcβ-3Glcβ-3Glc-AO                                                              |
| 70 |                           | Lam-6                                                                           | Glcβ-3Glcβ-3Glcβ-3Glcβ-3Glcβ-3Glc-AO*                                                       |
| 71 |                           | Lam-7                                                                           | Glcβ-3Glcβ-3Glcβ-3Glcβ-3Glcβ-3Glcβ-3Glc-AO                                                  |
| 72 |                           | Curd-8                                                                          | Glcβ-3Glcβ-3Glcβ-3Glcβ-3Glcβ-3Glcβ-3Glcβ-3Glc-AO*                                           |
| 73 |                           | Curd-9                                                                          | Glcβ-3Glcβ-3Glcβ-3Glcβ-3Glcβ-3Glcβ-3Glcβ-3Glcβ-3Glc-AO*                                     |
| 74 |                           | Curd-10                                                                         | Glcβ-3Glcβ-3Glcβ-3Glcβ-3Glcβ-3Glcβ-3Glcβ-3Glcβ-3Glcβ-3Glc-AO*                               |
| 75 |                           | Curd-11                                                                         | Glcβ-3Glcβ-3Glcβ-3Glcβ-3Glcβ-3Glcβ-3Glcβ-3Glcβ-3Glcβ-3Glcβ-3Glc-AO*                         |
| 76 |                           | Curd-12                                                                         | Glcβ-3Glcβ-3Glcβ-3Glcβ-3Glcβ-3Glcβ-3Glcβ-3Glcβ-3Glcβ-3Glcβ-3Glcβ-3Glc-AO*                   |
| 77 | Curd-13                   | Glcβ-3Glcβ-3Glcβ-3Glcβ-3Glcβ-3Glcβ-3Glcβ-3Glcβ-3Glcβ-3Glcβ-3Glcβ-3Glcβ-3Glc-AO* |                                                                                             |
| 78 | Linear Glcβ3<br>Synthetic | HE-8                                                                            | Glcβ-3Glcβ-3Glcβ-3Glcβ-3Glcβ-3Glcβ-3Glcβ-3Glc-AO                                            |
| 79 |                           | HE-9                                                                            | Glcβ-3Glcβ-3Glcβ-3Glcβ-3Glcβ-3Glcβ-3Glcβ-3Glc-AO                                            |
| 80 |                           | HE-10                                                                           | Glcβ-3Glcβ-3Glcβ-3Glcβ-3Glcβ-3Glcβ-3Glcβ-3Glcβ-3Glcβ-3Glcβ-3Glcβ-3Glc-AO                    |
| 81 | Linear Glcβ4<br>Cellulose | Cellobiose                                                                      | Glcβ-4Glc-AO                                                                                |
| 82 |                           | Cello-3                                                                         | Glcβ-4Glcβ-4Glc-AO                                                                          |
| 83 |                           | Cello-4                                                                         | Glcβ-4Glcβ-4Glcβ-4Glc-AO                                                                    |
| 84 |                           | Cello-5                                                                         | Glcβ-4Glcβ-4Glcβ-4Glcβ-4Glc-AO*                                                             |
| 85 |                           | Cello-6                                                                         | Glcβ-4Glcβ-4Glcβ-4Glcβ-4Glcβ-4Glc-AO*                                                       |
| 86 |                           | Cello-7                                                                         | Glcβ-4Glcβ-4Glcβ-4Glcβ-4Glcβ-4Glcβ-4Glc-AO*                                                 |
| 87 |                           | Cello-8                                                                         | Glcβ-4Glcβ-4Glcβ-4Glcβ-4Glcβ-4Glcβ-4Glcβ-4Glc-AO*                                           |
| 88 |                           | Cello-9                                                                         | Glcβ-4Glcβ-4Glcβ-4Glcβ-4Glcβ-4Glcβ-4Glcβ-4Glcβ-4Glc-AO*                                     |
| 89 |                           | Cello-10                                                                        | Glcβ-4Glcβ-4Glcβ-4Glcβ-4Glcβ-4Glcβ-4Glcβ-4Glcβ-4Glcβ-4Glc-AO*                               |
| 90 |                           | Cello-11                                                                        | Glcβ-4Glcβ-4Glcβ-4Glcβ-4Glcβ-4Glcβ-4Glcβ-4Glcβ-4Glcβ-4Glcβ-4Glc-AO*                         |
| 91 |                           | Cello-12                                                                        | Glcβ-4Glcβ-4Glcβ-4Glcβ-4Glcβ-4Glcβ-4Glcβ-4Glcβ-4Glcβ-4Glcβ-4Glcβ-4Glc-AO*                   |
| 92 |                           | Cello-13                                                                        | Glcβ-4Glcβ-4Glcβ-4Glcβ-4Glcβ-4Glcβ-4Glcβ-4Glcβ-4Glcβ-4Glcβ-4Glcβ-4Glcβ-4Glc-AO*             |
| 93 |                           |                                                                                 | Gentiobiose                                                                                 |
| 94 |                           | Pust-3                                                                          | Glcβ-6Glcβ-6Glc-AO                                                                          |
| 95 |                           | Pust-4                                                                          | Glcβ-6Glcβ-6Glcβ-6Glc-AO                                                                    |



|     |                               |                |                                                                       |
|-----|-------------------------------|----------------|-----------------------------------------------------------------------|
| 129 | Branched Glcβ3/6<br>Grifolan  | Grifo-6        | Glc (β-3/β-6) <sub>3-16</sub> -AO*                                    |
| 130 |                               | <b>Grifo-7</b> |                                                                       |
| 131 |                               | Grifo-8        |                                                                       |
| 132 |                               | Grifo-9        |                                                                       |
| 133 |                               | Grifo-10       |                                                                       |
| 134 |                               | Grifo-11       |                                                                       |
| 135 |                               | Grifo-12       |                                                                       |
| 136 |                               | Grifo-13       |                                                                       |
| 137 |                               | Grifo-14       |                                                                       |
| 138 |                               | Grifo-15       |                                                                       |
| 139 |                               | Grifo-16       |                                                                       |
| 140 | Branched Glcβ3/6<br>Lentinan  | Lenti-2        | Glc (β-3/β-6) <sub>2-13</sub> -AO*                                    |
| 141 |                               | Lenti-3        |                                                                       |
| 142 |                               | Lenti-4        |                                                                       |
| 143 |                               | Lenti-5        |                                                                       |
| 144 |                               | Lenti-6        |                                                                       |
| 145 |                               | <b>Lenti-7</b> |                                                                       |
| 146 |                               | Lenti-8        |                                                                       |
| 147 |                               | Lenti-9        |                                                                       |
| 148 |                               | Lenti-10       |                                                                       |
| 149 |                               | Lenti-11       |                                                                       |
| 150 |                               | Lenti-12       |                                                                       |
| 151 | Lenti-13                      |                |                                                                       |
| 152 | Branched Glcβ3/6<br>Synthetic | <b>HE-9B7</b>  | Glcβ-3Glcβ-3Glcβ-3Glcβ-3Glcβ-3Glcβ-3Glcβ-3Glc-AO<br> <br>Glcβ-6       |
| 153 |                               | <b>HE-10B2</b> | Glcβ-3Glcβ-3Glcβ-3Glcβ-3Glcβ-3Glcβ-3Glcβ-3Glcβ-3Glc-AO<br> <br>Glcβ-6 |
| 154 |                               | <b>HE-10B3</b> | Glcβ-3Glcβ-3Glcβ-3Glcβ-3Glcβ-3Glcβ-3Glcβ-3Glcβ-3Glc-AO<br> <br>Glcβ-6 |
| 155 |                               | <b>HE-10B5</b> | Glcβ-3Glcβ-3Glcβ-3Glcβ-3Glcβ-3Glcβ-3Glcβ-3Glcβ-3Glc-AO<br> <br>Glcβ-6 |
| 156 |                               | <b>HE-10B7</b> | Glcβ-3Glcβ-3Glcβ-3Glcβ-3Glcβ-3Glcβ-3Glcβ-3Glcβ-3Glc-AO<br> <br>Glcβ-6 |





**Table S7B.** Fluorescence binding intensities elicited with all the proteins investigated. The numerical scores for the fluorescence binding signals are shown as means of duplicate spots at 5 fmol probe per spot (as in Fig.5 and 6 and [supplemental Fig. 7](#)) and are representative of at least 2 independent experiments.

| ID <sup>1</sup> | Probe <sup>2</sup> | Murine Dectin-1 (Fc) | Murine Dectin-1 (His) | Human Dectin-1 (Fc) | DC-SIGN (Fc) | MOPC-104E (IgM) | 16.412E (IgA) | 3.4.1G6 (IgG) | 2G8 (IgG) | 1H8 (IgG) | 1E12 (IgM) | Tm CBM4-2 (His) | Cm CBM32-2 (His) | Bh CBM6 (His) | Cm CBM6-2 (His) | Ct CBM11 (His) | Tm CBM41 (His) | ConA |
|-----------------|--------------------|----------------------|-----------------------|---------------------|--------------|-----------------|---------------|---------------|-----------|-----------|------------|-----------------|------------------|---------------|-----------------|----------------|----------------|------|
| 1               | Xyl5(β4)           | -                    | - <sup>3</sup>        | -                   | -            | -               | -             | -             | -         | -         | 8,231      | -               | -                | 1,600         | 2,531           | -              | -              | -    |
| 2               | Xyl6(β4)           | -                    | -                     | -                   | -            | -               | -             | -             | -         | -         | 6,095      | -               | -                | 2,176         | 2,872           | -              | -              | -    |
| 3               | Man4(β4)           | -                    | -                     | -                   | 26,527       | -               | -             | -             | -         | -         | -          | -               | 859              | -             | 1,251           | -              | -              | -    |
| 4               | Man5(β4)           | -                    | -                     | -                   | 33,188       | -               | -             | -             | -         | -         | -          | -               | 736              | -             | 3,911           | -              | -              | -    |
| 5               | Man6(β4)           | -                    | -                     | -                   | 8,700        | -               | -             | -             | -         | -         | -          | -               | -                | -             | 1,937           | -              | -              | -    |
| 6               | Cyano-2            | -                    | -                     | -                   | 732          | -               | -             | -             | -         | -         | -          | -               | -                | -             | -               | -              | -              | -    |
| 7               | Cyano-3            | -                    | -                     | -                   | 7,139        | -               | -             | -             | -         | -         | -          | -               | -                | -             | -               | -              | -              | -    |
| 8               | Cyano-4            | -                    | -                     | -                   | 3,785        | -               | -             | -             | -         | -         | -          | -               | -                | -             | -               | -              | -              | -    |
| 9               | Cyano-5            | -                    | -                     | -                   | 1,953        | -               | -             | -             | -         | -         | -          | -               | -                | -             | -               | -              | -              | -    |
| 10              | Cyano-6            | -                    | -                     | -                   | 1,593        | -               | -             | -             | -         | -         | -          | -               | -                | -             | -               | -              | -              | -    |
| 11              | Cyano-7            | -                    | -                     | -                   | 3,539        | -               | -             | -             | -         | -         | -          | -               | -                | -             | -               | -              | -              | -    |
| 12              | Cyano-8            | -                    | -                     | -                   | 3,407        | -               | -             | -             | -         | -         | -          | -               | -                | -             | -               | -              | -              | -    |
| 13              | Cyano-9            | -                    | -                     | -                   | 3,567        | -               | -             | -             | -         | -         | -          | -               | -                | -             | -               | -              | -              | -    |
| 14              | Glc2(α3)           | -                    | -                     | -                   | 16,410       | 800             | -             | -             | -         | -         | -          | -               | -                | -             | 561             | -              | -              | -    |
| 15              | Poria-3            | -                    | -                     | -                   | -            | 4,485           | -             | -             | -         | -         | -          | -               | -                | -             | -               | -              | -              | -    |
| 16              | Poria-4            | -                    | -                     | -                   | -            | 21,829          | -             | -             | -         | -         | -          | -               | -                | -             | -               | -              | -              | -    |
| 17              | Poria-5            | -                    | -                     | -                   | 4,717        | 37,550          | -             | -             | -         | -         | -          | -               | -                | -             | -               | -              | -              | -    |
| 18              | Poria-6            | -                    | -                     | -                   | 2,166        | 40,972          | -             | -             | -         | -         | -          | -               | -                | -             | -               | -              | -              | -    |
| 19              | Poria-7            | -                    | -                     | -                   | -            | 47,596          | -             | -             | -         | -         | -          | -               | -                | -             | 586             | -              | 1,080          | -    |
| 20              | Poria-8            | -                    | -                     | -                   | -            | 33,957          | -             | -             | -         | -         | -          | -               | -                | -             | 664             | -              | 2,114          | -    |
| 21              | Poria-9            | -                    | -                     | -                   | -            | 2,394           | -             | -             | -         | -         | -          | -               | -                | 535           | 709             | -              | -              | -    |
| 22              | Poria-10           | -                    | -                     | -                   | -            | 3,064           | -             | -             | -         | -         | -          | -               | -                | -             | 612             | -              | 1,528          | -    |
| 23              | Poria-11           | -                    | -                     | -                   | -            | 2,097           | -             | -             | -         | -         | -          | -               | -                | -             | -               | -              | 746            | -    |
| 24              | Poria-12           | -                    | -                     | -                   | -            | 574             | -             | -             | -         | -         | -          | -               | -                | -             | -               | -              | -              | -    |
| 25              | Poria-13           | -                    | -                     | -                   | -            | 818             | -             | -             | -         | -         | -          | -               | -                | 507           | -               | -              | 1,071          | -    |
| 26              | Malto-2            | -                    | -                     | -                   | 15,895       | -               | -             | -             | -         | -         | -          | -               | -                | -             | -               | -              | 1,337          | -    |
| 27              | Malto-3            | -                    | -                     | -                   | 22,263       | -               | -             | -             | -         | -         | -          | -               | -                | -             | -               | -              | 12,382         | -    |
| 28              | Malto-4            | -                    | -                     | -                   | 8,168        | -               | -             | -             | -         | -         | -          | -               | -                | -             | -               | -              | 24,866         | -    |
| 29              | Malto-5            | -                    | -                     | -                   | 2,717        | -               | -             | -             | -         | -         | -          | -               | -                | -             | -               | -              | 25,079         | -    |

|    |          |   |   |   |        |   |        |        |   |       |       |        |        |        |        |   |        |     |
|----|----------|---|---|---|--------|---|--------|--------|---|-------|-------|--------|--------|--------|--------|---|--------|-----|
| 30 | Malto-6  | - | - | - | 5,875  | - | -      | -      | - | -     | -     | -      | -      | -      | -      | - | 35,382 | -   |
| 31 | Malto-7  | - | - | - | 5,174  | - | -      | -      | - | -     | -     | -      | -      | -      | -      | - | 31,123 | -   |
| 32 | Malto-8  | - | - | - | 6,250  | - | -      | -      | - | -     | -     | -      | -      | -      | -      | - | 39,910 | -   |
| 33 | Malto-9  | - | - | - | 2,548  | - | -      | -      | - | -     | -     | -      | -      | -      | -      | - | 25,146 | -   |
| 34 | Malto-10 | - | - | - | 4,106  | - | -      | -      | - | -     | -     | -      | -      | -      | 520    | - | 29,445 | -   |
| 35 | Malto-11 | - | - | - | 2,928  | - | -      | -      | - | -     | -     | -      | -      | -      | 628    | - | 28,806 | -   |
| 36 | Malto-12 | - | - | - | 3,270  | - | -      | -      | - | -     | -     | -      | -      | -      | 502    | - | 33,815 | -   |
| 37 | Malto-13 | - | - | - | 2,817  | - | -      | -      | - | -     | -     | -      | -      | -      | 697    | - | 32,685 | -   |
| 38 | Dext-2   | - | - | - | 4,239  | - | -      | -      | - | -     | -     | -      | -      | -      | 721    | - | -      | -   |
| 39 | Dext-3   | - | - | - | 2,338  | - | 1,962  | -      | - | -     | -     | -      | -      | -      | -      | - | 608    | -   |
| 40 | Dext-4   | - | - | - | 2,251  | - | 16,255 | -      | - | -     | -     | -      | -      | -      | 567    | - | -      | -   |
| 41 | Dext-5   | - | - | - | 1,520  | - | 22,598 | -      | - | -     | -     | -      | -      | -      | -      | - | -      | -   |
| 42 | Dext-6   | - | - | - | 1,607  | - | 36,421 | 3,472  | - | -     | -     | -      | -      | -      | 510    | - | -      | -   |
| 43 | Dext-7   | - | - | - | -      | - | 16,038 | 2,329  | - | -     | -     | -      | -      | -      | 603    | - | -      | -   |
| 44 | Dext-8   | - | - | - | -      | - | 16,306 | 5,505  | - | -     | -     | -      | -      | -      | 583    | - | -      | -   |
| 45 | Dext-9   | - | - | - | -      | - | 25,738 | 10,288 | - | -     | -     | -      | -      | -      | 721    | - | -      | -   |
| 46 | Dext-10  | - | - | - | -      | - | 14,628 | 6,169  | - | -     | -     | -      | -      | -      | 559    | - | -      | -   |
| 47 | Dext-11  | - | - | - | -      | - | 13,032 | 6,534  | - | -     | 889   | 736    | -      | 757    | 1,162  | - | -      | -   |
| 48 | Dext-12  | - | - | - | -      | - | 22,417 | 10,151 | - | -     | 533   | -      | -      | -      | 586    | - | -      | -   |
| 49 | Dext-13  | - | - | - | -      | - | 12,645 | 9,545  | - | -     | -     | -      | -      | -      | -      | - | -      | -   |
| 50 | Pano-3   | - | - | - | 1,319  | - | 1,462  | -      | - | -     | -     | -      | -      | -      | -      | - | -      | -   |
| 51 | i-Pano-3 | - | - | - | 2,538  | - | -      | -      | - | -     | -     | -      | -      | -      | -      | - | 12,799 | -   |
| 52 | Pullu-4  | - | - | - | 7,686  | - | 18,828 | -      | - | -     | -     | -      | -      | -      | -      | - | 582    | 706 |
| 53 | Pullu-7  | - | - | - | 2,411  | - | 28,691 | -      | - | -     | -     | -      | -      | -      | -      | - | 25,217 | 869 |
| 54 | CβG-2    | - | - | - | 10,660 | - | -      | -      | - | 3,964 | -     | 3,124  | 1,458  | 5,206  | -      | - | -      | -   |
| 55 | CβG-3    | - | - | - | 13,573 | - | -      | -      | - | 1,908 | -     | 10,005 | 3,931  | 9,253  | -      | - | -      | -   |
| 56 | CβG-4    | - | - | - | 16,420 | - | -      | -      | - | 1,453 | -     | 11,411 | 7,908  | 11,729 | -      | - | -      | -   |
| 57 | CβG-5    | - | - | - | 24,457 | - | -      | -      | - | 2,133 | -     | 28,076 | 22,382 | 19,184 | -      | - | -      | -   |
| 58 | CβG-6    | - | - | - | 30,343 | - | -      | -      | - | 1,463 | -     | 33,048 | 24,293 | 20,680 | -      | - | -      | -   |
| 59 | CβG-7    | - | - | - | 17,123 | - | -      | -      | - | 1,358 | -     | 27,992 | 20,445 | 17,484 | -      | - | -      | -   |
| 60 | CβG-8    | - | - | - | 14,431 | - | -      | -      | - | 1,350 | -     | 22,859 | 20,293 | 16,568 | -      | - | -      | -   |
| 61 | CβG-9    | - | - | - | 16,218 | - | -      | -      | - | 1,510 | -     | 40,293 | 31,821 | 23,567 | -      | - | -      | -   |
| 62 | CβG-10   | - | - | - | 8,395  | - | -      | -      | - | 859   | -     | 26,905 | 19,052 | 20,156 | -      | - | -      | -   |
| 63 | CβG-11   | - | - | - | 11,176 | - | 8,507  | 1,177  | - | -     | 1,147 | -      | 33,298 | 25,387 | 18,986 | - | -      | -   |
| 64 | CβG-12   | - | - | - | 5,417  | - | -      | -      | - | -     | -     | -      | 26,480 | 20,122 | 15,960 | - | -      | -   |

|    |          |       |        |       |        |   |   |   |        |        |        |        |        |        |        |   |   |   |
|----|----------|-------|--------|-------|--------|---|---|---|--------|--------|--------|--------|--------|--------|--------|---|---|---|
| 65 | CβG-13   | -     | -      | -     | 8,929  | - | - | - | -      | -      | -      | -      | 30414  | 25,881 | 18,989 | - | - | - |
| 66 | Lam-2    | -     | -      | -     | 6,100  | - | - | - | -      | 8,349  | -      | 1,459  | 594    | 4,414  | -      | - | - |   |
| 67 | Lam-3    | -     | -      | -     | 4,474  | - | - | - | -      | 10,609 | -      | 3,568  | 1,485  | 6,577  | -      | - | - |   |
| 68 | Lam-4    | -     | -      | -     | 9,079  | - | - | - | 1,459  | -      | 12,383 | 5,597  | 13,762 | 10,846 | 17,831 | - | - | - |
| 69 | Lam-5    | -     | -      | -     | 5,608  | - | - | - | 8,565  | 4,841  | 12,451 | 11,304 | 12960  | 14,041 | 17254  | - | - | - |
| 70 | Lam-6    | -     | -      | -     | 2,980  | - | - | - | 21,301 | 12,936 | 14,211 | 13,442 | 10,577 | 18,786 | 15,325 | - | - | - |
| 71 | Lam-7    | -     | -      | -     | 1,313  | - | - | - | 18,059 | 10,659 | 10,658 | 13,077 | 8,775  | 17,649 | 13,182 | - | - | - |
| 72 | Curd-8   | -     | -      | -     | 2,200  | - | - | - | 28,066 | 18,360 | 11,046 | 23,535 | 17,841 | 30,340 | 21,756 | - | - | - |
| 73 | Curd-9   | -     | -      | -     | 1,127  | - | - | - | 20,473 | 15,466 | 10,618 | 23,065 | 13,468 | 27,402 | 17,454 | - | - | - |
| 74 | Curd-10  | -     | -      | -     | 657    | - | - | - | 19,828 | 13,746 | 12,767 | 26,266 | 14,111 | 28,568 | 16,927 | - | - | - |
| 75 | Curd-11  | 629   | 2,111  | -     | -      | - | - | - | 22,139 | 16,898 | 6,318  | 24,966 | 15,359 | 29,733 | 20,037 | - | - | - |
| 76 | Curd-12  | 3,698 | 9,698  | 2,030 | -      | - | - | - | 24,639 | 16,820 | 4,244  | 30,060 | 20,952 | 30,026 | 25,282 | - | - | - |
| 77 | Curd-13  | 5,734 | 18,227 | 3,529 | -      | - | - | - | 16,971 | 12,260 | 3,795  | 32,683 | 13,775 | 30,747 | 17,497 | - | - | - |
| 78 | HE-8     | -     | -      | -     | 2,770  | - | - | - | 21,359 | 9,703  | 6,287  | 17,714 | 28,715 | 29,793 | 32,676 | - | - | - |
| 79 | HE-9     | -     | -      | -     | 1,019  | - | - | - | 14,179 | 8,213  | 4,633  | 13,629 | 18,795 | 21,742 | 25,574 | - | - | - |
| 80 | HE-10    | -     | -      | -     | 644    | - | - | - | 13,558 | 7,808  | 5,630  | 12,809 | 16,714 | 26,513 | 22,459 | - | - | - |
| 81 | Cello-2  | -     | -      | -     | 1,0701 | - | - | - | -      | 8,899  | -      | 1,188  | 1,024  | 5,376  | -      | - | - |   |
| 82 | Cello-3  | -     | -      | -     | 4,881  | - | - | - | -      | 10,943 | -      | 2,890  | 1,128  | 12,973 | -      | - | - |   |
| 83 | Cello-4  | -     | -      | -     | 2,600  | - | - | - | -      | 9,840  | -      | 2,775  | 1,567  | 12,059 | -      | - | - |   |
| 84 | Cello-5  | -     | -      | -     | 1,267  | - | - | - | -      | 8,567  | -      | 1,833  | 1,138  | 9,883  | -      | - | - |   |
| 85 | Cello-6  | -     | -      | -     | -      | - | - | - | -      | 9,603  | -      | 836    | -      | 7,304  | -      | - | - |   |
| 86 | Cello-7  | -     | -      | -     | 721    | - | - | - | -      | 8,418  | -      | 2,132  | 1,878  | 12,699 | -      | - | - |   |
| 87 | Cello-8  | -     | -      | -     | -      | - | - | - | -      | 8,137  | -      | 2,625  | 2,544  | 14,129 | -      | - | - |   |
| 88 | Cello-9  | -     | -      | -     | 1,918  | - | - | - | -      | 9,387  | -      | 7,450  | 8,500  | 23,494 | -      | - | - |   |
| 89 | Cello-10 | -     | -      | -     | 1,060  | - | - | - | -      | 11,388 | -      | 4,861  | 5,975  | 22,170 | -      | - | - |   |
| 90 | Cello-11 | -     | -      | -     | 542    | - | - | - | -      | 6,272  | -      | 3,647  | 4,673  | 17,387 | -      | - | - |   |
| 91 | Cello-12 | -     | -      | -     | -      | - | - | - | -      | 6,736  | -      | 2,463  | 2,857  | 13,632 | -      | - | - |   |
| 92 | Cello-13 | -     | -      | -     | -      | - | - | - | -      | 6,787  | -      | 2,623  | 4,699  | 15,876 | -      | - | - |   |
| 93 | Pust-2   | -     | -      | -     | 16,283 | - | - | - | -      | 12,094 | -      | 2,628  | 715    | 4,226  | -      | - | - |   |
| 94 | Pust-3   | -     | -      | -     | 3,471  | - | - | - | -      | 5,229  | -      | 4,072  | 1,479  | 6,542  | -      | - | - |   |
| 95 | Pust-4   | -     | -      | -     | 3,601  | - | - | - | -      | 4,129  | -      | 6,818  | 3,555  | 8,992  | -      | - | - |   |
| 96 | Pust-5   | -     | -      | -     | 4,612  | - | - | - | -      | 3,822  | -      | 9,130  | 5,817  | 10,958 | -      | - | - |   |
| 97 | Pust-6   | -     | -      | -     | 2,723  | - | - | - | -      | 4,976  | -      | 6,310  | 5,132  | 11,814 | -      | - | - |   |
| 98 | Pust-7   | -     | -      | -     | 1,279  | - | - | - | -      | 2,802  | -      | 4,500  | 3,949  | 9,337  | -      | - | - |   |
| 99 | Pust-8   | -     | -      | -     | 1,053  | - | - | - | -      | 2,402  | -      | 4,439  | 4,363  | 7,920  | -      | - | - |   |

|     |           |   |   |   |       |   |   |   |       |       |        |       |        |        |        |        |   |        |
|-----|-----------|---|---|---|-------|---|---|---|-------|-------|--------|-------|--------|--------|--------|--------|---|--------|
| 100 | Pust-9    | - | - | - | 2,560 | - | - | - | -     | -     | 1,027  | -     | 5,114  | 5,197  | 6,729  | -      | - | 1,363  |
| 101 | Pust-10   | - | - | - | 9,969 | - | - | - | -     | -     | 1,249  | -     | 7,081  | 7,636  | 7,865  | -      | - | 6,261  |
| 102 | Pust-11   | - | - | - | 6,530 | - | - | - | -     | -     | 995    | -     | 1,731  | 3,200  | 3,932  | -      | - | 2,471  |
| 103 | Pust-15   | - | - | - | 6,794 | - | - | - | -     | -     | 1,141  | -     | 6,999  | 10,597 | 9,811  | -      | - | 15,850 |
| 104 | Pust-15a  | - | - | - | 3,498 | - | - | - | -     | -     | 694    | -     | 2,688  | 4,761  | 5,804  | -      | - | 6,397  |
| 105 | Barley-3  | - | - | - | 3,439 | - | - | - | -     | -     | 12,258 | -     | 5,416  | 2,068  | 14,050 | -      | - | -      |
| 106 | Barley-3a | - | - | - | 2,924 | - | - | - | -     | -     | 9,369  | -     | 3,993  | 3,490  | 7,660  | -      | - | -      |
| 107 | Barley-3b | - | - | - | 3,516 | - | - | - | -     | -     | 10,305 | -     | 4,121  | 1,135  | 11,583 | -      | - | -      |
| 108 | Barley-4  | - | - | - | 685   | - | - | - | -     | -     | 6,977  | -     | 4,853  | 1,756  | 22,093 | -      | - | -      |
| 109 | Barley-4a | - | - | - | 1,673 | - | - | - | -     | -     | 9,799  | -     | 5,565  | 4,730  | 16,313 | -      | - | -      |
| 110 | Barley-4b | - | - | - | 1,109 | - | - | - | -     | -     | 6,261  | -     | 4,381  | 1,351  | 20,337 | -      | - | -      |
| 111 | Barley-4c | - | - | - | 3,914 | - | - | - | -     | -     | 8,504  | -     | 6,427  | 3,181  | 21,189 | -      | - | -      |
| 112 | Barley-5  | - | - | - | -     | - | - | - | -     | -     | 6,343  | -     | 4,326  | 3,110  | 19,285 | -      | - | -      |
| 113 | Barley-5a | - | - | - | 3,072 | - | - | - | 773   | -     | 10,831 | -     | 11,006 | 10,886 | 21,104 | -      | - | -      |
| 114 | Barley-6  | - | - | - | -     | - | - | - | -     | -     | 7,473  | -     | 4,124  | 4,306  | 24,017 | -      | - | -      |
| 115 | Barley-6a | - | - | - | 4,697 | - | - | - | 1,412 | -     | 13,401 | 1,808 | 22,154 | 24,640 | 35,452 | -      | - | -      |
| 116 | Barley-7  | - | - | - | -     | - | - | - | -     | -     | 7,265  | -     | 6,471  | 5,257  | 22,968 | 7,375  | - | -      |
| 117 | Barley-8  | - | - | - | -     | - | - | - | -     | -     | 4,937  | 1,309 | 4,813  | 5,854  | 24,158 | 8,756  | - | -      |
| 118 | Barley-9  | - | - | - | -     | - | - | - | -     | -     | 3,633  | 1,552 | 4,062  | 5,166  | 20,539 | 11,866 | - | -      |
| 119 | Barley-10 | - | - | - | -     | - | - | - | -     | -     | 2,705  | 1,004 | 708    | 2,007  | 14,614 | 8,503  | - | -      |
| 120 | Barley-11 | - | - | - | -     | - | - | - | -     | -     | 3,749  | 4,152 | 4,398  | 7,049  | 23,780 | 25,472 | - | -      |
| 121 | Barley-12 | - | - | - | -     | - | - | - | -     | -     | 2,123  | 2,010 | 723    | 2,241  | 15,117 | 14,574 | - | -      |
| 122 | Barley-13 | - | - | - | -     | - | - | - | -     | -     | 2,028  | 2,025 | 594    | 2,121  | 14,750 | 14,413 | - | -      |
| 123 | Barley-14 | - | - | - | -     | - | - | - | -     | -     | 1,078  | 5,381 | 686    | 3,710  | 18,294 | 23,499 | - | -      |
| 124 | Barley-15 | - | - | - | -     | - | - | - | -     | -     | 1,917  | 8,006 | 1,738  | 5,538  | 20,531 | 37,621 | - | -      |
| 125 | Barley-16 | - | - | - | -     | - | - | - | -     | -     | 858    | 3,993 | 640    | 3,250  | 14,286 | 24,280 | - | -      |
| 126 | Grifo-3   | - | - | - | 5,861 | - | - | - | -     | -     | 8,004  | -     | 10,327 | 6,490  | 10,478 | -      | - | -      |
| 127 | Grifo-4   | - | - | - | 4,045 | - | - | - | 691   | -     | 6,736  | -     | 10,702 | 9,189  | 13,168 | -      | - | -      |
| 128 | Grifo-5   | - | - | - | 2,465 | - | - | - | 1,696 | -     | 5,705  | -     | 12,051 | 11,336 | 16,648 | -      | - | -      |
| 129 | Grifo-6   | - | - | - | 1,395 | - | - | - | 1,231 | -     | 5,161  | 1,213 | 11,821 | 10,556 | 17,118 | -      | - | -      |
| 130 | Grifo-7   | - | - | - | 1,803 | - | - | - | 1,934 | 550   | 4,319  | 2,750 | 12,804 | 17,580 | 16,532 | -      | - | -      |
| 131 | Grifo-8   | - | - | - | 1,544 | - | - | - | 2,562 | 887   | 4,184  | 4,662 | 13,429 | 18,250 | 18,378 | -      | - | -      |
| 132 | Grifo-9   | - | - | - | -     | - | - | - | 3,408 | 960   | 3,269  | 3,420 | 9,784  | 13,663 | 13,035 | -      | - | -      |
| 133 | Grifo-10  | - | - | - | -     | - | - | - | 4,217 | 1,741 | 3,370  | 5,259 | 11,249 | 14,050 | 14,813 | -      | - | -      |
| 134 | Grifo-11  | - | - | - | -     | - | - | - | 4,459 | 2,577 | 3,314  | 5,638 | 10,594 | 17,630 | 14,773 | -      | - | -      |

|     |           |   |   |   |        |   |     |   |        |       |        |        |        |        |        |   |       |   |
|-----|-----------|---|---|---|--------|---|-----|---|--------|-------|--------|--------|--------|--------|--------|---|-------|---|
| 135 | Grifo-12  | - | - | - | -      | - | -   | - | 3,424  | 1,681 | 2,714  | 5,912  | 9,730  | 15,880 | 14,004 | - | -     | - |
| 136 | Grifo-13  | - | - | - | -      | - | -   | - | 3,278  | 2,014 | 2,265  | 7,109  | 11,035 | 18,527 | 14,003 | - | -     | - |
| 137 | Grifo-14  | - | - | - | -      | - | -   | - | 2,570  | 1,050 | 1,491  | 3,645  | 4,577  | 8,831  | 7,461  | - | -     | - |
| 138 | Grifo-15  | - | - | - | -      | - | -   | - | 2,900  | 1,271 | 1,877  | 4,568  | 7,499  | 13,090 | 10,736 | - | -     | - |
| 139 | Grifo-16  | - | - | - | -      | - | -   | - | 2,663  | 1,632 | 1,471  | 6,249  | 9,740  | 16,741 | 11,848 | - | -     | - |
| 140 | Lenti-2   | - | - | - | 9,906  | - | -   | - | -      | -     | 6,797  | -      | 5,158  | 1,767  | 7,953  | - | -     | - |
| 141 | Lenti-3   | - | - | - | 9,639  | - | -   | - | -      | -     | 6,596  | -      | 10,436 | 4,015  | 10,790 | - | -     | - |
| 142 | Lenti-4   | - | - | - | 6,362  | - | -   | - | 846    | -     | 7,591  | 848    | 15,111 | 9,075  | 14,444 | - | 1,380 | - |
| 143 | Lenti-5   | - | - | - | 18,339 | - | -   | - | 4,553  | 1,433 | 9,105  | 5,552  | 33,313 | 27,947 | 26,199 | - | 2,095 | - |
| 144 | Lenti-6   | - | - | - | 8,559  | - | -   | - | 12,763 | 4,464 | 5,549  | 6,754  | 22,172 | 21,553 | 21,988 | - | 1,021 | - |
| 145 | Lenti-7   | - | - | - | 5,063  | - | 535 | - | 14,011 | 6,393 | 5,063  | 9,698  | 2,1470 | 23,565 | 23,225 | - | 920   | - |
| 146 | Lenti-8   | - | - | - | 4,013  | - | -   | - | 14,462 | 7,256 | 6,354  | 11,594 | 19,612 | 30,943 | 23,785 | - | 1,032 | - |
| 147 | Lenti-9   | - | - | - | 1,708  | - | -   | - | 10,875 | 5,633 | 5,942  | 9,156  | 18,017 | 21,553 | 22,493 | - | 8,086 | - |
| 148 | Lenti-10  | - | - | - | 831    | - | -   | - | 6,559  | 2,415 | 2,880  | 5,609  | 9,681  | 13,685 | 15,211 | - | 3,900 | - |
| 149 | Lenti-11  | - | - | - | -      | - | -   | - | 4,022  | 1,750 | 1,968  | 4,851  | 5,835  | 9,859  | 10,253 | - | 2,046 | - |
| 150 | Lenti-12  | - | - | - | 1,291  | - | -   | - | 12,720 | 7,826 | 4,456  | 12,142 | 17,599 | 26,903 | 22,025 | - | 3,781 | - |
| 151 | Lenti-13  | - | - | - | 1,411  | - | -   | - | 15,353 | 8,824 | 4,945  | 12,489 | 22,955 | 27,399 | 29,975 | - | 8,971 | - |
| 152 | HE-9B7    | - | - | - | 611    | - | -   | - | 6,668  | 2,894 | 4,198  | 6,466  | 13,597 | 15,083 | 14,109 | - | -     | - |
| 153 | HE-10B2   | - | - | - | 689    | - | -   | - | 14,149 | 8,164 | 5,537  | 15,433 | 16,772 | 27,279 | 26,476 | - | -     | - |
| 154 | HE-10B3   | - | - | - | 601    | - | -   | - | 10,706 | 6,677 | 6,110  | 10,285 | 11,626 | 20,848 | 22,015 | - | -     | - |
| 155 | HE-10B5   | - | - | - | 932    | - | -   | - | 9,151  | 5,268 | 5,930  | 11,093 | 15,411 | 25,953 | 21,486 | - | -     | - |
| 156 | HE-10B7   | - | - | - | 978    | - | -   | - | 15,534 | 6,760 | 4,861  | 17,789 | 22,306 | 34,617 | 28,547 | - | -     | - |
| 157 | Gu-6B1/3  | - | - | - | 20,839 | - | -   | - | 590    | -     | 16,376 | -      | 48,324 | 25,675 | 30,669 | - | -     | - |
| 158 | HE-11B3/6 | - | - | - | -      | - | -   | - | 5,151  | 3,374 | 4,884  | 10,154 | 13,708 | 19,831 | 19,449 | - | -     | - |

<sup>1</sup>ID, Probe position in the microarray matching the position in the binding-charts and in [supplemental Table 7A](#).

<sup>2</sup>In the  $\beta$ 1,6-linked pustulan series, fractions containing oligomers with >DP-8 as major components (probes 100-103) there was evidence of a minor contaminant containing  $\alpha$ -linked mannose as detected by ConA binding. The weak binding detected to the NGLs of oligosaccharide fractions derived from branched  $\beta$ 1,3/ $\beta$ 1,6 lentinan (probes 142-151) was likely to the presence of an  $\alpha$ 1,4-linked glucose contaminant as corroborated by MS/MS ([supplemental Table 7A](#), footnote 3) and NMR (not shown).

<sup>3</sup>'-' refers to a fluorescence intensity < 500.



## Supplemental References

1. Huang, Q. and Zhang, L. (2005). Solution properties of (1 $\rightarrow$ 2)- $\alpha$ -D-glucan and its sulfated derivative from *Poria cocos* mycelia via fermentation tank. *Biopolymers* 79, 28-38.
2. Peters, T. (2007). The Use of NMR Spectroscopy in Carbohydrate–Protein Molecular Interactions. In *Comprehensive Glycoscience: From Chemistry to Systems Biology*: Elsevier B.V.
3. Roldos, V., Canada, F. J. and Jimenez-Barbero, J. (2011). Carbohydrate-protein interactions: a 3D view by NMR. *Chembiochem*. 12, 990-1005.
4. Boraston, A. B., Nurizzo, D., Notenboom, V., Ducros, V., Rose, D. R., Kilburn, D. G. and Davies, G. J. (2002). Differential oligosaccharide recognition by evolutionarily-related beta-1,4 and beta-1,3 glucan-binding modules. *J. Mol. Biol.* 319, 1143-1156.
5. van Bueren, A. L., Morland, C., Gilbert, H. J. and Boraston, A. B. (2005). Family 6 carbohydrate binding modules recognize the non-reducing end of beta-1,3-linked glucans by presenting a unique ligand binding surface. *J. Biol. Chem.* 280, 530-537.
6. Henshaw, J. L., Bolam, D. N., Pires, V. M., Czjzek, M., Henrissat, B., Ferreira, L. M., Fontes, C. M. and Gilbert, H. J. (2004). The family 6 carbohydrate binding module CmCBM6-2 contains two ligand-binding sites with distinct specificities. *J. Biol. Chem.* 279, 21552-21559.
7. Adams, E. L., Rice, P. J., Graves, B., Ensley, H. E., Yu, H., Brown, G. D., Gordon, S., Monteiro, M. A., Papp-Szabo, E., Lowman, D. W. et al. (2008). Differential high-affinity interaction of dectin-1 with natural or synthetic glucans is dependent upon primary structure and is influenced by polymer chain length and side-chain branching. *J. Pharmacol. Exp. Ther.* 325, 115-123.
8. Tanaka, H., Kawai, T., Adachi, Y., Hanashima, S., Yamaguchi, Y., Ohno, N. and Takahashi, T. (2012). Synthesis of beta(1,3) oligoglucans exhibiting a Dectin-1 binding affinity and their biological evaluation. *Bioorg. Med. Chem.* 20, 3898-3914.
9. Graham, L. M., Tsoni, S. V., Willment, J. A., Williams, D. L., Taylor, P. R., Gordon, S., Dennehy, K. and Brown, G. D. (2006). Soluble Dectin-1 as a tool to detect beta-glucans. *J. Immunol. Methods* 314, 164-169.
10. Geijtenbeek, T. B., van Duijnhoven, G. C., van Vliet, S. J., Krieger, E., Vriend, G., Figdor, C. G. and van, K. Y. (2002). Identification of different binding sites in the dendritic cell-specific receptor DC-SIGN for intercellular adhesion molecule 3 and HIV-1. *J. Biol. Chem.* 277, 11314-11320.
11. Wang, D., Liu, S., Trummer, B. J., Deng, C. and Wang, A. (2002). Carbohydrate microarrays for the recognition of cross-reactive molecular markers of microbes and host cells. *Nat. Biotechnol.* 20, 275-281.
12. Torosantucci, A., Chiani, P., Bromuro, C., De Bernardis, F., Palma, A. S., Liu, Y., Mignogna, G., Maras, B., Colone, M., Stringaro, A. et al. (2009). Protection by anti-beta-glucan antibodies is associated with restricted beta-1,3 glucan binding specificity and inhibition of fungal growth and adherence. *PLoS ONE*. 4, e5392.
13. Fischer, D., Loos, E. and Geyer, A. (2006). Oligo-(1 $\rightarrow$ 2)- $\alpha$ -D-glucopyranosyl-(1 $\rightarrow$ 2)-beta-D-fructofuranosides Form Tight Sugar Coils. *Angewandte Chemie International Edition* 45, 816-819.
14. Ciocchini, A. E., Guidolin, L. S., Casabuono, A. C., Couto, A. S., de Iannino, N. I. and Ugalde, R. A. (2007). A glycosyltransferase with a length-controlling activity as a mechanism to regulate the size of polysaccharides. *Proc. Natl. Acad. Sci. U.S.A* 104, 16492-16497.
15. Du, Y., Gu, G., Hua, Y., Wei, G., Ye, X. and Yu, G. (2004). Synthesis and antitumor activities of glucan derivatives. *Tetrahedron* 60, 6345-6351.
16. Wang, X., Xu, X. and Zhang, L. (2008). Thermally Induced Conformation Transition of Triple-Helical Lentinan in NaCl Aqueous Solution. *J. Phys. Chem. B* 112, 10343-10351.
17. Yu, H., Williams, D. L. and Ensley, H. E. (2005). 4-Acetoxy-2,2-dimethylbutanoate: a useful carbohydrate protecting group for the selective formation of [beta]-(1 $\rightarrow$ 3)-D-glucans. *Tetrahedron Letters* 46, 3417-3421.
18. Yan, J., Zong, H., Shen, A., Chen, S., Yin, X., Shen, X., Liu, W., Gu, X. and Gu, J. (2003). The [beta]-(1 $\rightarrow$ 6)-branched [beta]-(1 $\rightarrow$ 3) glucohexaose and its analogues containing an [alpha]-(1 $\rightarrow$ 3)-linked bond have similar stimulatory effects on the mouse spleen as Lentinan. *International Immunopharmacology* 3, 1861-1871.



19. Haworth, W. N., Hirst, E. L. and isherwood, F. A. (1937). Polysaccharides. Part XXIV. Yeast mannan. *J Chem Soc*, 748-790.
20. McCleary, B. V. and Matheson, N. K. (1987). Enzymic analysis of polysaccharide structure. *Advances in Carbohydrate Chemistry and Biochemistry* 44, 147-276.
21. Arellano-Reynoso, B., Lapaque, N., Salcedo, S., Briones, G., Ciocchini, A. E., Ugalde, R., Moreno, E., Moriyon, I. and Gorvel, J. P. (2005). Cyclic [beta]-1,2-glucan is a brucella virulence factor required for intracellular survival. *Nat Immunol* 6, 618-625.
22. Zhang, H. T., Zhan, X. B., Zheng, Z. Y., Wu, J. R., English, N., Yu, X. B. and Lin, C. C. (2012). Improved curdlan fermentation process based on optimization of dissolved oxygen combined with pH control and metabolic characterization of *Agrobacterium* sp. ATCC 31749  
1. *Appl. Microbiol. Biotechnol.* 93, 367-379.
23. Black, W. A. P., Cornhill, W. J., Dewar, E. J. and Woodward, F. N. (1951). Manufacture of algal chemicals. III. Laboratory-scale isolation of laminarin from brown marine algae. *J Appl. Chem.*, 501-517.
24. Hong, F., Hansen, R. D., Yan, J., Allendorf, D. J., Baran, J. T., Ostroff, G. R. and Ross, G. D. (2003). Beta-glucan functions as an adjuvant for monoclonal antibody immunotherapy by recruiting tumoricidal granulocytes as killer cells. *Cancer Res* 63, 9023-9031.
25. Jamas, S., Easson, D. D. J., Ostroff, G. R. and Onderdonk, A. B. (1991). Glucans a novel class of macrophage activating immunomodulators. *ACS Symp Ser* 469, 44-51.
26. Yoo, D. H., Lee, B. H., Chang, P. S., Lee, H. G. and Yoo, S. H. (2007). Improved Quantitative Analysis of Oligosaccharides from Lichenase-Hydrolyzed Water-Soluble Barley + $\beta$ -Glucans by High-Performance Anion-Exchange Chromatography. *J. Agric. Food Chem.* 55, 1656-1662.
27. de la Cruz, C. J., Pintor-Toro, J. A., Benitez, T. and Llobell, A. (1995). Purification and characterization of an endo-beta-1,6-glucanase from *Trichoderma harzianum* that is related to its mycoparasitism. *J. Bacteriol.* 177, 1864-1871.
28. Palma, A. S., Feizi, T., Zhang, Y., Stoll, M. S., Lawson, A. M., Diaz-Rodríguez, E., Campanero-Rhodes, A. S., Costa, J., Brown, G. D. and Chai, W. (2006). Ligands for the beta-glucan receptor, Dectin-1, assigned using 'designer' microarrays of oligosaccharide probes (neoglycolipids) generated from glucan polysaccharides. *J Biol. Chem.* 281, 5771-5779.
29. Palma, A. S., Zhang, Y., Childs, R. A., Campanero-Rhodes, M. A., Liu, Y., Feizi, T. and Chai, W. (2012). Neoglycolipid-Based "Designer" Oligosaccharide Microarrays to Define beta-Glucan Ligands for Dectin-1. *Methods Mol. Biol.* 808, 337-359.
30. Guo, Y., Feinberg, H., Conroy, E., Mitchell, D. A., Alvarez, R., Blixt, O., Taylor, M. E., Weis, W. I. and Drickamer, K. (2004). Structural basis for distinct ligand-binding and targeting properties of the receptors DC-SIGN and DC-SIGNR. *Nat. Struct. Mol. Biol.* 11, 591-598.
31. van, L. E., Bank, C. M., Mehta, P., Garcia-Vallejo, J. J., Kawar, Z. S., Geyer, R., Alvarez, R. A., Cummings, R. D., Kooyk, Y. and Van, D., I. (2006). Specificity of DC-SIGN for mannose- and fucose-containing glycans. *FEBS Lett.* 580, 6123-6131.
32. Su, S. V., Hong, P., Baik, S., Negrete, O. A., Gurney, K. B. and Lee, B. (2004). DC-SIGN binds to HIV-1 glycoprotein 120 in a distinct but overlapping fashion compared with ICAM-2 and ICAM-3. *J. Biol. Chem.* 279, 19122-19132.
33. Geurtsen, J., Chedammi, S., Mesters, J., Cot, M., Driessen, N. N., Sambou, T., Kakutani, R., Ummels, R., Maaskant, J., Takata, H. et al. (2009). Identification of Mycobacterial alpha-Glucan As a Novel Ligand for DC-SIGN: Involvement of Mycobacterial Capsular Polysaccharides in Host Immune Modulation. *Journal of Immunology* 183, 5221-5231.
34. Leon, M. A., Young, N. M. and McIntire, K. R. (1970). Immunochemical studies of the reaction between a mouse myeloma macroglobulin and dextrans. *Biochemistry* 9, 1023-1030.
35. Matsuda, T. and Kabat, E. A. (1989). Variable Region Cdna Sequences and Antigen-Binding Specificity of Mouse Monoclonal-Antibodies to Isomaltosyl Oligosaccharides Coupled to Proteins - T-Dependent Analogs of Alpha(1- $\beta$ )Dextran. *Journal of Immunology* 142, 863-870.

36. Nashed, E. M., Perdomo, G. R., Padlan, E. A., Kovac, P., Matsuda, T., Kabat, E. A. and Glaudemans, C. P. (1990). Binding characteristics of IgA 16.4.12E, a monoclonal antibody with specificity for the nonreducing terminal epitope of alpha-(1----6)-dextrans. Comparisons between IgA hybridoma 16.4.12E and myeloma W3129. *J. Biol. Chem.* 265, 20699-20707.
37. Chen, H. T., Makover, S. D. and Kabat, E. A. (1987). Immunochemical studies on monoclonal antibodies to stearyl-isomaltotetraose from C58/J and a C57BL/10 nude mouse  
1. *Mol. Immunol.* 24, 333-338.
38. Capodicasa, C., Chiani, P., Bromuro, C., De, B. F., Catellani, M., Palma, A. S., Liu, Y., Feizi, T., Cassone, A., Benvenuto, E. et al. (2011). Plant production of anti-beta-glucan antibodies for immunotherapy of fungal infections in humans. *Plant Biotechnol. J.* 9, 776-787.
39. Boraston, A. B., Warren, R. A. and Kilburn, D. G. (2001). beta-1,3-Glucan binding by a thermostable carbohydrate-binding module from *Thermotoga maritima*. *Biochemistry* 40, 14679-14685.
40. Centeno, M. S., Goyal, A., Prates, J. A., Ferreira, L. M., Gilbert, H. J. and Fontes, C. M. (2006). Novel modular enzymes encoded by a cellulase gene cluster in *Cellvibrio mixtus*  
1. *FEMS Microbiol Lett.* 265, 26-34.
41. Pires, V. M., Henshaw, J. L., Prates, J. A., Bolam, D. N., Ferreira, L. M., Fontes, C. M., Henrissat, B., Planas, A., Gilbert, H. J. and Czjzek, M. (2004). The crystal structure of the family 6 carbohydrate binding module from *Cellvibrio mixtus* endoglucanase 5a in complex with oligosaccharides reveals two distinct binding sites with different ligand specificities  
1. *J. Biol. Chem.* 279, 21560-21568.
42. Carvalho, A. L., Goyal, A., Prates, J. A., Bolam, D. N., Gilbert, H. J., Pires, V. M., Ferreira, L. M., Planas, A., Romao, M. J. and Fontes, C. M. (2004). The family 11 carbohydrate-binding module of *Clostridium thermocellum* Lic26A-Cel5E accommodates beta-1,4- and beta-1,3-1,4-mixed linked glucans at a single binding site. *J. Biol. Chem.* 279, 34785-34793.
43. Viegas, A., Bras, N. F., Cerqueira, N. M., Fernandes, P. A., Prates, J. A., Fontes, C. M., Bruix, M., Romao, M. J., Carvalho, A. L., Ramos, M. J. et al. (2008). Molecular determinants of ligand specificity in family 11 carbohydrate binding modules: an NMR, X-ray crystallography and computational chemistry approach. *FEBS J.* 275, 2524-2535.
44. Viegas, A., Sardinha, J., Freire, F., Duarte, D. F., Carvalho, A. L., Fontes, C. M., Romao, M. J., Macedo, A. L. and Cabrita, E. J. (2013). Solution structure, dynamics and binding studies of a family 11 carbohydrate-binding module from *Clostridium thermocellum* (CtCBM11). *Biochem. J.* 451, 289-300.
45. van Bueren, A. L., Finn, R., Ausio, J. and Boraston, A. B. (2004). alpha-Glucan recognition by a new family of carbohydrate-binding modules found primarily in bacterial pathogens. *Biochemistry* 43, 15633-15642.
46. van Bueren, A. L. and Boraston, A. B. (2007). The structural basis of alpha-glucan recognition by a family 41 carbohydrate-binding module from *Thermotoga maritima*  
13. *J. Mol. Biol.* 365, 555-560.
47. Chai, W., Stoll, M. S., Galustian, C., Lawson, A. M. and Feizi, T. (2003). Neoglycolipid technology - deciphering information content of glycome. *Methods Enzymol.* 362, 160-195.
48. Liu, Y., Feizi, T., Campanero-Rhodes, M. A., Childs, R. A., Zhang, Y., Mulloy, B., Evans, P. G., Osborn, H. M., Otto, D., Crocker, P. R. et al. (2007). Neoglycolipid probes prepared via oxime ligation for microarray analysis of oligosaccharide-protein interactions. *Chem. Biol.* 14, 847-859.
